## Single-cell RNAseq uncovers involution mimicry as an aberrant development pathway during breast cancer metastasis

Fatima Valdes-Mora<sup>1,2\*</sup>, Robert Salomon<sup>3,4\*</sup>, Brian Gloss<sup>5\*</sup>, Andrew MK. Law<sup>5</sup>, Kendelle Murphy<sup>6</sup>, Daniel L. Roden<sup>2,3</sup>, Lesley Castillo<sup>5,7</sup>, Yolanda Colino-Sanguino<sup>1</sup>, Zoya Kikhtyak<sup>5</sup>, Nona Farbehi<sup>3</sup>, James RW. Conway<sup>6</sup>, Samantha R. Oakes<sup>2,7</sup>, Thomas Cox<sup>2,8</sup>, Paul Timpson<sup>2,6</sup>, Christopher J. Ormandy<sup>2,7#</sup> and David Gallego-Ortega<sup>2,5#</sup>✉.

1. Histone Variant Laboratory, Genomics and Epigenetics Division, Garvan Institute of Medical Research, Sydney, NSW Australia.
2. St. Vincent's Clinical School, Faculty of Medicine, UNSW Sydney, NSW, Australia.
3. Garvan-Weizmann Centre for Cellular Genomics. Garvan Institute of Medical Research. Sydney, NSW, Australia.
4. *Current:* Institute for Biomedical Materials and Devices, University of Technology Sydney. Sydney, NSW, Australia
5. Tumour Development Laboratory, The Kinghorn Cancer Centre, Garvan Institute of Medical Research, Sydney, NSW Australia.
6. Invasion and Metastasis Laboratory, The Kinghorn Cancer Centre, Garvan Institute of Medical Research, Sydney, NSW Australia.
7. Cancer Biology Laboratory, The Kinghorn Cancer Centre, Garvan Institute of Medical Research, Sydney, NSW Australia.
8. Matrix and Metastasis Laboratory, The Kinghorn Cancer Centre, Garvan Institute of Medical Research, Sydney, NSW Australia.

\* joint-first authors

# joint-senior authors

✉ Correspondence: [d.gallego@garvan.org.au](mailto:d.gallego@garvan.org.au)

## Abstract

Single-cell RNA-seq has emerged as a powerful method to unravel heterogeneity of complex biological systems; this has enabled *in vivo* characterization of cell type compositions through unsupervised sampling and modelling of transcriptional states in single cells. Here we used the high-throughput microfluidic-based single-cell RNA-seq method Drop-seq to elucidate the cellular composition and functional diversity of breast tumours during the induction of metastatic disease in a transgenic model related to pregnancy-associated breast cancer (PABC). We characterised with unprecedented definition, how the activation of developmental programs associated to pregnancy results in the acquisition of an aggressive phenotype. We show that cancer cells are classified in a structure comparable with the lineages of the epithelial mammary gland hierarchy, revealing high dynamics and plasticity of cancer cells during disease progression. This cancer progression program is orchestrated by alveolar milk secretory cells, that in conjunction with cell types from the tumour microenvironment (TME), including cancer-associated fibroblasts (CAFs), form a multi-cellular process that resembles an aberrant involution. Finally, we analysed the interactome of the tumour ecosystem to define a high-resolution landscape of the molecular pathways of cell-to-cell communication that underpins extra-cellular remodelling and inflammation associated with the aggressive involution mimicry.

In conclusion, our study recapitulates developmental mechanisms that have gone awry during carcinogenesis in a model of PABC. We provide a large-scale single-cell transcriptional landscape of breast tumours that allows unprecedented understanding of breast heterogeneity and deep analysis of key molecular events that result in cancer malignancy.

## 1. Introduction

The mammary gland is a unique organ that undergoes a series of developmental processes that mostly occur postnatally, reaching its functional secretory capacity after puberty<sup>1</sup>. In its adult form, the mammary gland is mainly formed of an epithelial ductal tree surrounded by the fat pad, a structure rich in adipocytes and fibroblasts that serves as a scaffold<sup>2,3</sup>. The mammary epithelium is highly dynamic and its hierarchical structure varies in response to physiological factors<sup>4</sup> and the local paracrine factors within the tissue microenvironment (TME)<sup>5-10</sup>. Such dynamic hierarchical structure is underpinned by a number of intermediate progenitors and cells with pluripotent capacity (reviewed in<sup>11,12</sup>, however the existence of unipotent or bipotent stem cells and their identity is still controversial<sup>13-21</sup>

The developmental stages that take place during pregnancy, lactation and involution are the most intense and result in extensive changes in tissue morphogenesis<sup>11</sup>. During pregnancy the mammary gland undergoes extensive gland maturation and alveologensis in preparation for lactation; this is characterised by epithelial cell proliferation and differentiation into alveolar milk-secretory cells, followed by the replacement of the interstitial adipose tissue with alveolar cells and an increase in vascularisation. Adipocytes, fibroblasts and endothelium are thus reorganised to support the newly formed epithelium and the intensive metabolic demand of milk production<sup>1</sup>. The immune system is also intimately involved during pregnancy, participating in ductal branching and epithelial invasion through the fat-pad<sup>1</sup>. In preparation for lactation, at the second half of pregnancy, Prl induces the up-regulation of Elf5, the master transcriptional regulator of alveolar cell fate<sup>22,23</sup>, and other factors involved in milk production and mammary gland remodelling such as, Stat5<sup>24-26</sup> and Gata-3<sup>27-29</sup>. The expression of Elf5 orchestrates the differentiation of the CD61+ luminal progenitor cells (also EpCAM<sup>high</sup>/Sca1<sup>+</sup>/CD49b<sup>+</sup>,<sup>12</sup>) towards the CD61- alveolar differentiated population developing epithelial-like properties and polarisation and that ultimately result in the acquisition of secretory properties<sup>11,23</sup>.

Mammary involution is also a highly complex multicellular process that occurs upon weaning when the lactating mammary gland returns to a quasi-

nulliparous state<sup>1,30</sup>; it can be divided into two stages, the first one is characterised by intense apoptosis of the secretory alveolar cells, and the second phase is governed by tissue remodelling, mediated by stromal fibroblasts and immune cells, and adipogenesis. In the involuting mammary gland, neutrophils and macrophages are in charge of cleaning the apoptotic bodies of the collapsing alveoli as well as regulating inflammation by suppressing the adaptive immune response. Fibroblasts are also activated during involution to fill the areas left by the dying epithelium in a pseudo-wound healing process<sup>31</sup>. Thus, the exquisitely regulated morphogenesis of the mammary gland implies a high degree of cell-to-cell communication within the mammary epithelium but also throughout a vast array of cell types from the tissue microenvironment.

One of the most active areas of research in the last years has been the study of the contribution of normal process during mammary gland development to breast cancer. The different epithelial cell lineages of the mammary gland have been associated with the cell of origin of the breast cancer subtypes<sup>32,33</sup>, including those with specific genetic aberrations<sup>33,34</sup>. Furthermore, the association of developmental cues within breast cancer is not restricted to the epithelial compartment, as tissue morphogenesis encompasses dramatic changes within the epithelial ductal tree as well as its surrounding stroma. Importantly, pregnancy-associated breast cancer (PABC) is correlated with metastatic disease and poor prognosis (reviewed in<sup>35</sup>). One of the possible reasons for the higher mortality in PABC is the effects of the hormonal load associated with the onset of pregnancy, however there is increasing evidence pointing to a direct effect of the TME and the events of tissue remodelling that occur in the mammary gland during pregnancy, in particular those associated to involution, as the driving force behind PABC<sup>31,35,36</sup>. In this context, we have previously shown that pregnancy-associated transcriptional networks driven by Elf5 promote a lethal phenotype in breast cancer, including resistance to therapy<sup>37</sup> and promotion of metastatic disease<sup>38</sup>. Elf5 profoundly affects cell intrinsic properties of breast cancer cells but it also heavily alters the TME dramatically increasing metastasis formation.

Here we use our pregnancy-associated breast cancer pre-clinical model of Elf5 overexpression in the MMTV/PyMT mice to study tumour heterogeneity at single-

cell resolution. Our high-resolution cellular landscape analysis reveals strong plasticity and functional diversity of distinct cancer cell lineages, identifying cell types that are involved in key events during breast cancer progression, EMT, collagen deposition, inflammation and hypoxia. Our model recapitulates developmental mechanisms that have gone awry during carcinogenesis and that are heavily implicated in the promotion of metastatic disease on Elf5/PyMT tumours at single-cell resolution. Using orthogonal methods, we confirm how cancer cells hijack and subvert a developmental program that resembles mammary gland involution to promote pro-tumourigenic properties, including tissue remodelling, sustained inflammation that results in cancer immunotolerance and ultimately in metastasis. Lastly, we describe the cell to cell interactions in tumours from all cellular compartments. We find two particular cancer-associated fibroblast (CAF) subpopulations with features of involuting mammary fibroblasts that are dominantly presented in Elf5 tumours and suggest a crosstalk between cancer epithelial cells and CAFs to promote features of involution in breast cancer.

## **2. Materials and Methods**

### **Animal statement, doxycycline induction**

To promote tumour progression, ELF5 expression was specifically induced in mammary epithelial cells since puberty (6 weeks-old) through doxycycline containing food as performed previously<sup>38</sup>. At ethical endpoint (7-13% tumour/body weight) mice were euthanized and tumours harvested and processed for single cell digestions as previously performed<sup>38</sup>.

### **Tumour digestion and FACS**

Mammary tumours were collected from MMTV-PyMT mice at 14 weeks of age, when tumour weights were 10±3% of total weight. Areas of necrosis were excluded and only regions of epithelial mammary carcinomas were used for digestion and analysis. Tumours were manually dissected into 3-5mm pieces using a surgical scalpel blade before being chopped to 100µm with maximum blade force on a McIlwain Tissue chopper. Tumour samples were incubated with 15,000 U of collagenase (Sigma #C9891) and 5,000 U of hyaluronidase (Sigma #H3506) dissolved in DMEM high glucose with 5% FBS at 37°C shaking in 220rpm for 1 hour. Samples were briefly disrupted with a pipette every 15 min during the incubation time to ensure the tissues were sufficiently resuspended. 0.25% trypsin (Gibco #15090-046)

in 1mM EGTA was used to digest the samples for 1min in 37°C waterbath before proceeding with a 5 minute incubation with 5mg/mL of dispase (Roche #04942078001) dissolved in PBS in 37°C waterbath. Red blood cells were then lysed with 0.8% ammonium chloride (Sigma #A9434) dissolved in water for 5 min in 37°C waterbath. Samples were washed with PBS containing 2% FBS and spun at 1200rpm for 5min at 4°C between each step. The supernatant was aspirated and 1mg/mL DNase (Roche) was mixed with the sample before incubation with each step. Finally, cells were filtered through a 40µM nylon mesh (Corning) and resuspended in PBS with 2% FBS. FACS was performed as detailed in <sup>37,38</sup>. Briefly, cells were sorted on the FACSAriaIII (Becton Dickinson) following automated compensation (FACSDiVa) using a 100um nozzle. Cell were sorted using a purity mask to ensure purities of the sorted population in excess of 99%. Antibodies with conjugated fluorophores for sorting stromal cells used included CD140b (clone REA634) from MACS (Miltenyi Biotech), CD140a (clone APA5) from Biolegend, and CD34 (clone RAM34) from BD Pharmingen.

### **Auto macs cleanup**

The viability of the cells was assessed by FACS. All tumours that contained less than 80% viable cells were labelled with Annexin specific MACS beads and dead cells were removed by passing the labelled cells through the autoMACS® Pro (Miltenyi). Highly viable cells (>85% viability assessed by DAPI in FACS) were loaded into the microfluidic Drop-seq pipeline.

### **Drop-seq**

Cells were captured using the microfluidic devices described for Dropseq <sup>39</sup> following the Online Drop-seq Laboratory Protocol version 3.1 ([www.mccarrolllab.com/dropseq](http://www.mccarrolllab.com/dropseq)). The tagged and multiplexed cDNA libraries were sequenced in Nextseq 500 using Nextseq 500 High Output v.2 kit (75 cycles, Illumina Cat# FC-404-2005) following Macosko et al. recommendations with the following modifications. Drop-seq denatured libraries were loaded at 1.3pM final concentration and were spiked in with 10% of 1.8pM PhiX Control v3 (Illumina Cat# FC-110-3001). Sequencing specifications were as follows: 26bp Read1, 51bp Read 2 and single Nextera indexing (8bp). A total of ~3,000 cells/ per run were sequenced.

## Bioinformatic analysis

The sequencing output was analysed using the McCarroll lab cookbook a custom genome (mm10 plus Trinity assemblies of transgene sequences <sup>40</sup>) and gene annotation (gencode vM14 plus). Seurat (v Seurat\_2.3.4 <sup>41</sup>) was the main platform for downstream analysis.

Firstly, we removed low-quality cells by modelling mitochondrial to nuclear gene content to <15% <sup>39</sup> and considering differences between homeostatic tissues and tumours (SuppFig. 1). We subsequently removed outlier cells that contained more than 4,000 genes as they could potentially constitute cell doublets. Thus, in summary, DGE matrices were trimmed for quality metrics (>200 genes, <15% mitochondrial reads, <1200 UMI and genes expressed in at least 3 cells).

These genes were organised into principal components that defined the variation in gene expression among our samples, SuppFig. 2 contains the genes associated to the most informative principal components in decreasing contribution to variation in gene expression (SuppFig. 2C) numbered PC1-18 (SuppFig. 2D). A graphic representation of the most informative PCs (SuppFig. 2E) revealed little variation among tumours from different animals of the same genotype. Two thirds of the total variation of the system was defined by the first 20 PCs corresponding to the second inflection point of the “elbow” plot shown in SuppFig. 2C.

Evaluation of potential batch effect was performed by PCA visualisation in the first 3 dimensions and outlier experiments were omitted. PyMT tumours are derived from the signal of the Polyoma middle-T oncogene in congenic FBVn animals of pure background, thus the effects of the environment are minimised as the individuals are exposed to identical controlled standard laboratory conditions.

QC filtering resulted in expression data for 15,702 genes across 28945 cells. Downstream analysis was performed according to Butler et al with UMI number regression and 20 principal components of variable genes being used for dimensional reduction (TSNE) and cluster calling <sup>41</sup>.

Clustering tree <sup>42</sup> was employed in conjunction with cluster validation, and split error estimation across a range of clustering resolutions to identify optimal resolution values. CCA was performed on experiments split by genotype using the union of the top 2000 variable genes for each genotype. No cells were discarded from downstream analysis to retain unique subpopulations between the experiments and downstream analysis was performed as above using CCA in place of PCA.

Monocle (v2 ole<sup>43</sup>) was used to assemble cells assigned to epithelial clusters along a pseudotime vector generated from single cell expression of “Gorsmy”<sup>44</sup>. States were assigned using DDRTree according to the manual.

CellphoneDB<sup>45</sup> was performed for 100 cells expressing the highest number of genes in each cluster. A specific interaction was considered as significant if  $p < 0.01$  and mean score  $> 0.3$ . Expression values of ligand/receptor gene pairs were plotted using Seurat DotPlot function for all cells in each cluster.

GSVA<sup>46</sup> was calculated for averaged expression values for clusters or Poisson distributed counts data using gene mouse hallmark gene lists downloaded from <http://bioinf.wehi.edu.au/software/MSigDB><sup>47,48</sup>. Metasignatures were generated by calculating the sum of scaled expression scores for all genes nominated for the signature in each cell. The relative contribution of each gene to the score was used to rank genes in the signature.

#### Clinical samples and survival analysis

We used the METABRIC (Molecular Taxonomy of Breast Cancer International Consortium) dataset for our survival analysis<sup>49</sup>. This dataset contains RNAseq data as well as detailed clinical information from breast cancer patients.

Patient survival analysis was performed using the “survminer” package (<https://github.com/kassambara/survminer>). Survival Curves were drawn using 'ggplot2'. R package version 0.4.3 on METABRIC data accessed from the R-Based API for Accessing the MSKCC Cancer Genomics Data Server, CGDSR (R package cgdsr version 1.2.10). Cohorts were split by ELF5 expression and then by metascores and overall survival was compared by cox proportional hazards analysis.

#### **Second Harmonic Generation (SHG) collagen imaging and analysis**

SHG signal was acquired using a 25x 0.95 NA water objective on an inverted Leica DMI 6000 SP8 confocal microscope. Excitation source was a Ti:Sapphire femtosecond laser cavity (Coherent Chameleon Ultra II), tuned to a wavelength of 880 nm and operating at 80 MHz. Signal intensity was recorded with RLD HyD detectors (420/40 nm). For tumour samples, 5 representative regions of interest (512  $\mu\text{m}$  x 512  $\mu\text{m}$ ) per tumour were imaged, for CDMs 3 representative areas of 3 technical replicates over a 3D z-stack (20  $\mu\text{m}$  depth; 20  $\mu\text{m}$  depth for CDM, with a z-step size of 1.26  $\mu\text{m}$ ). SHG signal coverage in tumour samples was measured with ImageJ (National Institutes of Health, Bethesda, MD, USA). For CDMs mean SHG



intensity was measured using Matlab (Mathworks). Representative images of maximum projections are shown.

### **Polarized light microscopy of picrosirius red stained sections and quantification of collagen content and birefringence.**

Paraffin-embedded samples were cut into 4 µm sections and stained with 0.1% picrosirius red for fibrillar collagen according to manufacturer's instructions. As previously performed<sup>50,51</sup> polarized light imaging was performed on a Leica DM6000 fitted with a polarizer in combination with a transmitted light analyser. Quantitative intensity measurements of fibrillar collagen content and birefringent signal were carried out using in house scripts in ImageJ. The relative area of red-orange (high birefringent) fibres, yellow (medium birefringent) fibres, and green (low birefringent) fibres (as a % of total fibres) was calculated.

### **Hypoxia analysis**

Tumours and lungs were harvested and fixed in 10% neutral-buffered formalin overnight. FFPE tissues were sectioned to 4µm for IHC staining as described in<sup>38</sup>. Following the manufacturer's instructions, the FITC-conjugated pimonidazole primary antibody (Hypoxyprobe, 1:1000) and the anti-FITC secondary antibody (Hypoxyprobe 1:100) was used to stain for the pimonidazole adducts. Quantification of hypoxia in IHC was performed using Andy's DAB Algorithm<sup>52</sup>.

### **Mammary gland whole mounting and immunohistochemistry**

Mouse mammary glands from FVB/N mice with established lactation and mammary tumours from PyMT/WT and PyMT/ELF5 were fixed, defatted, dehydrated and carmine stained and paraffin embedded as previously described<sup>53</sup>. Sections were stained with haematoxylin and eosin and with a mouse milk specific protein antibody (Accurate Chemical & Scientific CO, Cat #YNRMMSP) under conditions previously described<sup>53</sup>.

### **Western Blot and Immunohistochemistry**

Western Blot analyses of protein were performed as previously detailed in<sup>37</sup>. The primary antibodies not described in Kalyuga et al were used as follows: E-Cadherin

(BD bioscience #610181, 1:10,000) and Vimentin (Leica Biosystems # VIM-572-L-CE).

Mouse mammary glands and tumours from PyMT mice were fixed, defatted, dehydrated, stained in Carmine alum and Paraffin embedded as previously described<sup>53</sup>. Sections were stained with the rabbit anti-mouse milk proteins antibody (Accurate Chemical & Scientific CO, # YNRMTM) diluted 1:12,000 as per<sup>53</sup>.

### 3. Results

#### **Unbiased high-resolution scRNAseq captures cell heterogeneity of MMTV-PyMT mammary tumours.**

Fifteen MMTV-PyMT mouse mammary tumours were harvested and analysed using Drop-seq, eight tumours from MMTV-PyMT/WT mice (PyMT/WT) and seven tumours from MMTV-PyMT/ELF5 (PyMT/ELF5) mice (Fig 1A). We Drop-seq-captured and sequenced a total of 26,613 cells (18,828 from WT tumours and 7,785 from ELF5 tumours). After applying stringent filtering conditions (See Material and Methods), 15,702 cells proceeded with the analysis (11,490 WT cells and 4,212 Elf5 cells). The distribution of genes identified in each replicate was consistent in all tumours analysed with the exception of tumour WT5 that showed a generally lower coverage with a consistent lower number of UMIs identified (SuppFig. 2A). However, this did not seem to impact subsequent analysis when the tumours were grouped by genotype, the distribution of number of genes identified and number of transcripts was very similar. The mean of genes that characterised each tumour cell was 1,079 unique genes from 2,535 UMIs, this included low and high transcriptionally active cells. We found a very strong correlation (0.97) between the number of UMIs and number of genes identified, indicating that the vast proportion of sequences obtained contributed to define the gene expression profile of each cell (SuppFig. 2B).

We used the dispersion and robustness of gene expression to define 6,176 informative genes in our data set that showed differences in expression level. Amongst these genes we identified typical marker genes of the three main cell compartments of PyMT tumours, namely epithelium, stroma and immune (Fig. 1B, highlighted in red, blue and green, respectively). We used these top-20 PCs to model the cell diversity in PyMT tumours (SupplFig. 2C and D) and performed K-means

neighbour clustering classification of cells (SuppFig. 3). Cells from the biological replicates contributed to all cell clusters (SuppFig. 3A) indicating that the defined principal components were not driven by technical batch effects; rather induction of ELF5 expression was the major driver of diversity in variation of gene expression, we found a strong east-west polarisation in the main cluster driven by forced ELF5 expression (cluster I, SuppFig. 3B), however this effect was not observed in the smaller cell clusters (II-VII, SuppFig. 3B).

We identified the presence of the main cellular compartments in the tumours using cell signatures defined by Aran and colleagues,<sup>54</sup> (Fig. 1C). This analysis classified our cells into the three major cell classes, epithelium, stroma and immune cells. The majority of cells were defined as epithelial cells (63.16%); tumour associated stroma represented 20.41% of the cells identified; and the tumour-infiltrated immune cell compartment accounted for 16.44%. The composition of PyMT tumours found using Drop-seq was consistent with cell surface marker analysis (FACS) using EpCAM to define epithelial cells, CD45 to define leukocyte and non-stained cells to define the stroma (Fig. 1C, left bottom panel). The main cluster (I) was of epithelial origin and thus the polarisation effect derived from forced Elf5 expression was confined to the epithelial cell compartment. We confirmed the identification of these three major cellular components using the expression of canonical markers for each compartment (Fig. 1D).

We then used differential gene expression analysis and k-means clustering to identify cell lineages within these major cell classes (Fig. 2A & B). This clustering method generated 16 different cell classes present in the tumours at different abundances, revealing further cell heterogeneity in all major cell cluster; 6 classes of cancer epithelial cells (clusters 0, 1, 2, 4, 7 and 10), 5 stromal classes (clusters 5, 6, 8, 9 and 15) and 5 classes of tumour infiltrated immune cells (clusters 3, 11, 12, 13 and 14). We used a cluster tree representation<sup>42</sup> to visualise the phylogeny of the different clusters (Fig. 2C). Two main “families” of immune cells, three of stromal cells and two of cancer cells were defined very early in the phylogeny representing the major cell subclasses. The top differential marker genes that define stromal and immune cell compartments is shown in Fig. 2D). Such cell diversity within the major compartments was also validated using xCell algorithm<sup>54</sup> (Fig. 2E). The xCell signatures clearly identified endothelial cells and various classes of fibroblasts in the stromal compartment; a clear segregation between T-cells and all the other immune

species such as B-cells, the diverse array of myeloid cells, macrophages, dendritic cells, monocytes, basophils and neutrophils. In the cancer epithelial cell compartment a separate cluster of cancer cells consistent with a basal stem-cell enriched population (cluster 10) and a cluster rich of cell cycle related genes (cluster 7) were the only two clusters not related to the previously shown east-west axis of cell polarisation driven by forced Elf5 expression.

### **PyMT cancer cells are organised in a structure that resembles the mammary gland epithelial hierarchy.**

In our Drop-seq analysis, the major difference between genotypes was confined to the epithelial cell compartment. Thus, we performed an independent clustering on the epithelial subset cohort of cells (6475 PyMT/WT and 3233 PyMT/Elf5 cells) at an increased resolution (Fig. 3). Epithelial tumour cells were distributed in 11 clusters (Figure 3A and SupplFig 4B). Figure 3B shows the strong genotype-driven cell polarisation in the epithelial compartment, which was not due to batch effects (SuppFig. 5 and Extended Methods). The tSNE plot from Figure 3B shows that clusters 1 and 6 were formed mostly in response to forced ELF5 expression (>2 Fold of cells belong to PyMT/ELF5 mice, Fig. 3B Sankey diagram), while clusters 0, 7, 9, 4 and 3 were formed mostly by WT cells (>2Fold of cells belong to PyMT/WT mice). Clusters 2, 5, 8 and 10 were present in both WT and forced ELF5 expressing tumours (<2 Fold of cells from any of the genotypes). This distribution is consistent with the expression of Elf5 in each of these clusters (Fig 3B, top violin plots). Concomitantly with the scRNAseq data, FACS analysis of the cancer epithelial cells revealed that Elf5 forced differentiation of the luminal progenitors, defined by a decrease in the proportion of Sca1<sup>low</sup>/CD49b<sup>+</sup> progenitor cells<sup>12</sup> within the luminal (EpCam<sup>+</sup>/CD49f<sup>+</sup>) population (Fig 3C).

We used the gene expression signatures defining the major epithelial cell lineages of the normal mammary gland<sup>44</sup> to determine which cell lineages best represented our MMTV-PyMT epithelial cell clusters. Ternary plots shown in SuppFig. 6A revealed that most clusters fell closest to the luminal progenitor corner, but clusters 7 and 8 were located towards the basal region while cluster 10 and a portion of the cells that belonged to cluster 9 were located towards the ML signature. Importantly, Cluster 10 showed very low levels of the PyMT oncogene (Fig. 3B bottom violin plot), suggesting that this cluster could be formed of untransformed

normal cells that were trapped within the mass of the tumours, this hypothesis is consistent with the small number of cells that belonged to this cluster. To increase the definition provided by these signatures we also annotated PyMT clusters using the mammary epithelial lineage markers defined by Bach and cols.<sup>55</sup> (Fig. 3D). Cluster 0 and 7 expressed genes consistent with Procr+ multipotent/stem cells. Cluster 9 cells expressed hormone sensing (Hs) lineage markers, cluster 8 expressed markers for Basal (B)/ Myoepithelial (Myo) cells, clusters 1, 2, 3, 4, and 6 presented markers consistent with luminal cells, with clusters 2, 3, and 4 presenting progenitor markers while cluster 1 and 6 presented markers consistent with alveolar differentiated cells. By far, Clusters 5 and 10 were the most undefined clusters, showing mixed luminal and myoepithelial markers. Figure 3E shows the top differential markers associated to the malignant state of the main lineages of the mammary gland. Interestingly cluster 5 markers were strongly consistent with cycling cells, indicating that dividing cells are clustered together irrespective of their origin and could explain the reason why this cluster shows mixed gene markers.

### **Dynamic relationship and states of the malignant lineages of PyMT tumours: implications for the cell of origin of cancer.**

To further investigate the differentiation states present within the luminal lineage in the PyMT tumours, we performed pseudotime analysis using Monocle (Fig. 4). We used the mammary gland hierarchy gene signature<sup>44</sup> to build the pseudotime structure of the PyMT cancer epithelial cells identifying 7 discrete states (Fig. 4A). Consistent with previous results, ELF5 had a profound impact upon the structure of the epithelial cell diversity biasing the composition of the cells towards one of the right axes of the pseudotime plot (dominated by state 7) at the expense of a depletion of states 2, 4, 5 and 6. We then visualised the Monocle defined cell states using the coordinates from the tSNE (Fig. 4B) which allowed us to overlap the cell cluster identity defined in Figure 3 with the pseudotiming states from Fig. 4B (Fig. 4C and Supp.Fig 6B).

The alveolar lineage was clearly defined by 2 distinct cell identities (cell clusters 1 and 6); the sensor lineage was composed of cluster 9, and the myoepithelial/basal lineage was formed by clusters 7 and 8. An undifferentiated cluster with multipotent/stem characteristics (cluster 0, apart from the cluster 5 of the cycling cells) sat in a position equidistant from the myoepithelial and the luminal

lineages (alveolar and sensor). Interestingly, and consistently with the literature where stem cell properties are confounded by myoepithelial properties<sup>56</sup>, cluster 7 was classified by Monocle as part of the basal/myoepithelial lineage, however this cluster presents strong multipotent characteristics similar to those present in cluster 0. The most difficult compartment to define was the luminal progenitor (represented by cluster 2, 3 and 4) presumably due to their strong plasticity and subtle differential features.

To gain insights in this definition, we used GSVA and metasignatures (See Material and Methods) to score each of the clusters according to the mammary gland epithelial signatures defined by Pal and cols. (Fig. 4D). Hierarchical clustering based on GSVA scores associated Cluster 2 with the alveolar lineage suggesting its identity as a pre-alveolar committed luminal progenitor, or a cell type that sits in the hinge between the luminal progenitor and the alveolar lineages. Similarly, Cluster 4 was associated to the hormone-sensing lineage represented by Cluster 9, indicating a luminal progenitor committed towards this lineage. In this scenario, Cluster 3 remained undefined so we classified it as uncommitted luminal progenitor. tSNE visualisations of these metasignatures are shown in Fig 4D which further confirmed the cell distribution of the three main mammary epithelial lineages. The distribution of the different lineages in the two genotypes is shown in Fig. 4E.

Figure 4F shows the relationship between clusters at different resolutions. These cluster tree groups are consistent with the cell states defined in the trajectory analysis. The phylogeny shown in the cluster tree revealed an early separation between the two major lineages, the myoepithelial/undifferentiated (Cluster 0 from resolution 0.1) and luminal lineages (Cluster 1 from resolution 0.1).

Altogether, the combination analysis of gene signatures, gene markers and pseudotiming enabled the precise annotation of PyMT cell clusters within the mammary hierarchy proposed by Pal et al., identifying a large luminal lineage that retains most of the cell diversity and strong plasticity, a basal/myoepithelial compartment and a hormone-sensing lineage (Fig. 4G).

### **Molecular mechanisms of cancer progression associated to cancer cells of Alveolar origin.**

The functional annotation of the identified epithelial cell clusters, using GSVA, showed the expected functions of the annotated cell types from Figure 4G

(Supp. Fig. 7 and Table 1). A detailed discussion on the biological functions associated to each cluster can be found in Supplementary Information

We next sought to validate some of the functional findings found in cancer cells of Alveolar origin (Clusters 1 and 6) characteristic of PyMT/ELF5 tumours, including the decrease of cell proliferation, lack of EMT and increase of hypoxia (<sup>37,38,57</sup> and Table 1). Figure 5A shows the distribution of cell cycle marker signatures <sup>58</sup> in the epithelial cell compartment. These signatures identified a specific group exclusively populated by cells undergoing G2M/S, PyMT/ELF5 tumours showed an enrichment on G1, this is consistent with our previous results of the effects of Elf5 increasing cell cycle times by delaying entry in S phase in cell lines of human breast cancer <sup>37</sup>, and with reduced cell proliferation in PyMT tumours <sup>38</sup>.

We then performed GSVA for specific signatures of known functions of Elf5, and functions suggested by the Hallmark analysis from SupplFig 7, which included lactation, involution, EMT and hypoxia (Fig. 5B). This analysis revealed strong inductions of lactation, involution, MET and hypoxia associated to Elf5/alveolar tumours (Fig. 5B). A tSNE visualisation of the EMT gene signature showed strong association with myoepithelial and undifferentiated cells and a negatively enrichment in cells of other lineages, including alveolar cells (Fig. 5C) which it is a known characteristic of Elf5 effects <sup>37,38,57</sup>. Western Blot on total cell lysates of PyMT/WT and /ELF5 tumours for canonical markers of EMT that have been previously identified to be regulated by Elf5 via repression of SNAI2 <sup>57</sup> confirmed that Elf5 tumours were depleted of such EMT markers at the protein level. Although E-Cadherin levels were not significantly different, Elf5/alveolar tumours show a clear reduction of Vimentin (Vim) indicating MET (Fig. 5C).

We have previously shown that PyMT/ELF5 tumours presented extensive vascular leakiness, a fact that can lead to increased hypoxia <sup>38</sup>. Cells enriched for a hypoxic gene signature concentrated in myoepithelial and alveolar cells (Fig. 5D). We confirmed these findings using hypoxyprobe to identify hypoxic regions in the tumours. Immunohistochemistry showed extensive hypoxic regions in PyMT/ELF5 tumours compared to their WT counterparts, indicating that alveolar cells are strong drivers of events leading to hypoxia or these cells are able to survive better in hypoxic regions. This phenotype was strong enough to induce hypoxia in the metastases of a highly oxygenated tissue such as the lung (Fig. 5D).

As expected, the lactation signature was strongly enriched in cells of alveolar origin (Fig. 5E, top tSNE plot). Immunohistochemistry using anti-milk antibodies revealed a strong production of milk in PyMT/ELF5 tumours compared to PyMT/WT tumours (Fig. 5E, IHC pictures). The production of milk in a context where there is no suckling pup or structure of the mammary gland to be able to eject milk, results in the accumulation of milk in PyMT/ELF5 tumours. In the normal mammary gland, milk stasis subsequently generates the signals that trigger mammary involution. In this scenario, we could identify an involution gene signature<sup>59</sup> associated with the luminal lineage in PyMT tumours, specifically enriched in alveolar cells (Fig. 5E, bottom tSNE plot).

High Elf5 expression levels are a poor prognosis factor in luminal breast cancer<sup>38</sup>, thus we asked whether lactation and/or involution signatures could predict for patient survival. We used the METABRIC dataset<sup>60</sup> first to assess the effects of Elf5 expression in breast cancer patients in this cohort. We found a significant association between Elf5 high expression and poorer patient prognosis, and also a consistently higher proportion of TNBC basal subtype in the Elf5-high group (Fig. 5F), which goes in line with previous reports<sup>37</sup>. We have previously shown the importance of Elf5 in the acquisition of endocrine therapy resistance, thus we next assessed the prognostic value of the involution and lactation signatures in the luminal subtype. Importantly, Elf5 expression, the involution signature (Fig. 5G, top panels) or the lactation signature alone (data not shown) did not have predictive value, however the presence of the involution gene signature in Elf5-high patients was exclusively associated with poor prognosis (Fig. 5G, bottom panels). The lactation signature combined with Elf5 did not show any significant association (data not shown).

Taken together, single-cell transcriptomics enables the identification of biological properties of mammary tumours and, in particular, the role of mimicry involution associated with the Elf5-alveolar subtype in luminal breast cancer.

### **Characterisation of cancer-associated fibroblasts in PyMT tumours**

The involution process involves cell apoptosis and tissue remodelling, the latter of which is orchestrated by stromal and immune cells<sup>61</sup>. Among these cell types, fibroblasts have a critical role in the extracellular matrix remodelling and



immune suppression during involution<sup>62</sup>. Thus, we further explored the role of cancer-associated fibroblasts (CAFs) in aberrant involution in our model.

Unsupervised clustering on the fibroblast subset (2,255 pooled cells from PyMT/WT and PyMT/Elf5 tumours, SuppFig. 8A) revealed three major fibroblast clusters (res 0.1) (Fig. 6A and SuppFig. 8B). tSNE representation of the cell cycle showed that a cell subgroup of Cluster 2 corresponded to cycling cells (SuppFig. 8C, LHS), which was further grouped as a unique cluster under a higher resolution (res 0.4) (SuppFig. 8C, RHS).

CAFs are known to be highly diverse, which it was confirmed in our system as classical fibroblast markers<sup>63</sup> failed to be specific to our transcriptomically defined clusters (SuppFig. 8D). Previous unbiased scRNAseq analyses in human tumours has classified two major CAF subtypes<sup>64,65</sup>: activated myofibroblasts, involved in tissue remodelling architecture by physical forces; and secretory CAFs related to ECM synthesis and cyto- and chemokine production<sup>66</sup>. Clusters 0 and 1 were enriched for a secretory CAF signature (CAFs-0 and CAFs-1) while the activated myofibroblast signature was concentrated in Cluster 2 (CAFs-2) (Fig. 6B). Functional annotation using GSVA analysis (SuppFig. 9A) revealed that secretory CAFs-0 were governed by hallmarks of EMT, suggesting a tissue remodelling function; while secretory-CAFs-1 clearly showed immune-related functions (top enriched hallmarks “Interferon alpha response”, “IL6/JAK/STAT3 signalling” and “Interferon gamma response”). Additional datasets of CAF function<sup>67</sup> further confirmed such differences among clusters (Fig 6C & D): CAFs-0 were enriched for an desmoplastic signature, characterised by genes involved in extra cellular matrix (ECM) interactions; CAFs-1 showed characteristics of immune/inflammatory fibroblasts, with genes involved in cytokine-cytokine receptor interactions, monocyte recruitment and the Complement Cascade; and CAFs-2 were enriched for a contractile signature, characterised by the expression of genes involved in actin cytoskeleton organisation.

Taken together, we have functionally characterised three different classes of fibroblasts in PyMT tumours, 2 secretory-CAFs classes that we defined as ECM-CAFs (CAFs-0) and immune-CAFs (iCAFs) (CAFs-1); and a contractile CAF-myofibroblast class.

**CAFs from Elf5/PyMT mammary tumours show features of mimicry involution.**

Mammary involuting fibroblasts have unique properties that include a high production of fibrillar collagen, ECM remodelling and immune suppression through monocyte recruitment<sup>62</sup>. This specialised class of fibroblast involved in involution are characterised by the expression of *Col1a1*, *Cxcl12*, *Tgfb1* and *Mmp3*. Within our PyMT tumours we identified a group of ECM-CAFs and iCAFs with high expression of these involution markers (Fig. 6E, upper tSNE plot). These cells were further defined as discrete groups when a higher resolution was applied in the clustering (Fig. 6E middle panel. Clusters 2 and 3) and confirmed an enriched CAF-involution signature for both cell Clusters 2 and 3 (Figure 6E bottom violin plots), from now on called involution-iCAFs and involution-ECM-CAFs, respectively. Involution-CAFs were enriched in PyMT/Elf5 tumours where >2 fold of involution-CAFs, Cluster 2 and 3, belonged to PyMT/ELF5 mice (Fig. 6F). Supplementary Figure 8E demonstrated that such genotype polarisation was not due to batch effects. Consistently, GSVA of the CAF-involution signature and involution marker genes were significantly enriched in the CAFs from ELF5 tumours compared to the WT (Fig. 6G).

The functional annotation of the involution fibroblasts revealed specific differences within each ECM- or immune- CAF subpopulations (SuppFig. 9B). For example, the top pathways of the involution ECM-CAFs that were unique of this ECM subgroup, fatty acid metabolism and peroxisome hallmarks, suggested that these cells may correspond to adipocyte-like fibroblasts arisen through a de-differentiation process of mature adipocytes<sup>68</sup> or transdifferentiation process of activated fibroblasts<sup>69</sup>. Adipocyte-derived fibroblasts secrete fibronectin and collagen I and have invasive properties<sup>68,70</sup>. Moreover, during the stromal remodelling stage in involution, there is a re-differentiation of the adipocytes<sup>61,71</sup>. Thus, this involution ECM-CAF population might correspond to highly secretory CAFs that are able to remodel the ECM in a similar way to that which involuting fibroblasts would re-organise the ECM to facilitate the detachment of the apoptotic alveoli and the repopulation of the stroma by adipocytes. Involution iCAFs, on the other hand, showed pathways linked to a wound-healing process, including inflammation through the complement cascade and coagulation<sup>59,72,73</sup>. The late stages of involution share many wound-healing properties such as high immune cell infiltration and immune suppression<sup>74</sup>, thus this involution iCAFs might be responsible for these two immune-related processes.

Our finding on CAFs activation mediated by Elf5-alveolar epithelial cells has never been reported before, thus we performed orthogonal functional validation for the role of CAFs in ECM remodelling by the production of collagen fibres in both PyMT/WT and PyMT/Elf5 tumours. Second Harmonic Generation (SHG) imaging and picrosirius red staining of tumour sections showed an increase in fibrillar collagen coverage in PyMT/Elf5 tumours compared with their PyMT/WT counterparts (Fig. 7A and B). Polarised light microscopy showed that PyMT/Elf5 tumours had a significantly higher proportion of thicker and mature collagen fibres than PyMT/WT tumours (Fig. 7C). Further analysis of matrix ultrastructure revealed a more complex spatial arrangement (peak alignment ( $\pm 10$  degrees from peak)) of collagen fibres in PyMT/Elf5 tumours than in PyMT/WT tumours (Fig 7D). Taken together these results show higher fibroblast activity both in collagen deposition and in their rearrangement in PyMT/Elf5 tumours.

### **Characterisation of the cell-to-cell interactions involved in the cancer-associated involution mimicry.**

Our findings showed that CAFs responded to involution signals presumably originated in the alveolar cancer cell compartment. As the TME is highly complex and there are numerous possible cellular interactions we used our high-resolution single cell RNAseq data to identify networks of cell-to-cell communication in PyMT tumours.

Recently, CellphoneDB was implemented to explore cellular interactions among ensembles of cells from scRNAseq data <sup>45</sup>. CellphoneDB is a manually curated repository of ligand-receptor interacting pairs ([www.CellPhoneDB.org](http://www.CellPhoneDB.org)) combined with a statistical framework to predict cell-to-cell connections (see Material and Methods). CellphoneDB analysis in PyMT tumours revealed an intricate network of cell interactions, allowing us to define molecular pathways for cell communication in almost all of the cell clusters (Fig. 8). Figure 8A shows the interactome of all cell clusters defined in this study (Figure 3 for the epithelial clusters, Figure 6 for the CAFs and Figure 2 for all other clusters). These interactions were ranked from strongest to weakest (Fig 8A, count above mean 0.3) which allowed us to divide them in three levels: 1) Fibroblast-Fibroblast interactions were the strongest followed by Fibroblast-epithelium connections; 2) Endothelium-fibroblast or -epithelium and epithelium-epithelium interactions were ranked as mid interactions; and 3) the

weakest connections were found in the immune cell compartment. These results show a pivotal role of CAFs as hubs of communication within the TME.

Involution accounts for an interactive cell network where epithelial cells, fibroblasts and immune cells are the key players<sup>61</sup>. Thus, we next focused on exploring such communication network based on CellphoneDB. We interestingly found that when the most restrictive cut offs were applied (Fig. 8B, 1<sup>st</sup> and 2<sup>nd</sup> Tier, blue lines), the ECM-CAFs (involution and fibroblast cluster 2) and involution iCAFs showed the largest number of interactions between themselves and also with the two Elf5 enriched-alveolar epithelial cells clusters (epithelial Clusters 1 and 6), the myoepithelial cells and the luminal progenitor hormone sensing cells (LP Hs). In the immune system interactive network (Fig. 8B, 3<sup>rd</sup> and 4<sup>rd</sup> Tiers, green lines). The myeloid compartment showed the strongest and biggest number of connections and interestingly, myeloid cells communicate with the two alveolar epithelial clusters, with ECM CAFs (involution and fib cluster 2), involution iCAFs, myofibroblasts and with the endothelium. Involution is associated with the M2-like innate response, such these results are in line with an activated and interactive innate myeloid response<sup>30,59,75</sup>.

We then investigated what particular ligand/receptor interactions were found among CAFs, alveolar epithelial and myeloid cells in order to find common pathways linked to involution (Fig. 8C). Overall, we found pathways associated with the multi-functional aspects of involution (TGF $\beta$  axis)<sup>76,77</sup>; networks associated with an immune suppressive ecosystem (Cxcl12 and Dpp4 axis)<sup>62,78</sup> and ECM remodelling (IGF axis)<sup>79</sup> (Fig. 8C). Transforming growth factor  $\beta$ 2 and 3 (TGF $\beta$ 2 and TGF $\beta$ 3) are ligands produced by CAFs and the two alveolar epithelial clusters, while their receptor TGF $\beta$ R3 is exclusively expressed in involution ECM and iCAFs and in iCAFs-1 (Fig. 8C and D).

The chemokine Cxcl12 is exclusively expressed in the involution iCAFs and two of its known receptors, CXC chemokine receptor 4 (CXCR4) and atypical chemokine receptor 3 (ACKR3 or CXCR7), are expressed in iCAFs-1 and B and T cells, respectively. Dipeptidyl peptidase-4 (Dpp4) was expression was restricted to iCAFs-1 and showed a highly interactive axis; Dpp4 connected with the involution iCAFs through Cxcl12 and with myeloid cells through Cxcl2 and Cxcl10. The IGF1/IGF1R signalling pathway was found to be highly specific to the two involution CAF

subtypes, ECM and immune, in which a predicted positive feedback loop among these cells was observed. Of note is that IGF signalling is classically associated with collagen and ECM remodelling in fibroblasts <sup>79</sup>.

We have previously demonstrated that infiltrated myeloid-derived suppressor cells (MDSC) are involved in Elf5-driven lung metastasis in PyMT tumours <sup>38</sup> and our CellphoneDB analysis confirmed a high number of interactive networks of myeloid cells with the rest of the tumour components, therefore suggesting that MDSC might be responsible for some of these interactions. Unfortunately, due to the low number of myeloid cells from our unbiased Drop-seq approach we were unable to further divide the myeloid compartment into their subtypes, especially for the detection of MDSC which is a rare-cell population <sup>80</sup>. However our scRNAseq showed expression of genes from well-known signalling pathways for MDSC expansion, recruitment and malignant activation <sup>81</sup> (Fig. 8D). G-CSF (Csf3), a potent growth factors to attract and recruit MDSCs, was expressed in cancer cells associated to the alveolar clusters, which could explain the increased infiltration of MDSCs in PyMT/Elf5 tumours <sup>38</sup>. Malignant activation of MDSCs is also driven by M-CSF (Cfs1), mainly expressed by CAFs. In addition, VEGF (Vegfa), was highly secreted by alveolar, basal cancer cells and CAFs, and IL6 is mainly secreted by CAFs and endothelial cells, these are factors that contribute to MDSC expansion. Potent MDSCs chemo-attractants were expressed by a diverse range of cell types within the tumour, Cxcl1 is ubiquitously expressed in most cell types, while Cxcl2 which can be found at low expression on many cell types, was highly expressed in the myeloid cell cluster, suggesting this is a mechanism that tumours may use to maintain a feedback loop enabling continuous myeloid cell recruitment. Other recruitment factors such as Cxcl12 previously described or Ccl2 are specifically secreted by CAFs. Altogether, our results show that MDSCs recruitment and malignant activation is not just driven by cancer cells but by a complex molecular network that originates within all cell compartments in the TME, mainly CAFs, endothelial cells and infiltrated myeloid species.

In summary, we have found that cells in the TME of PyMT tumours are highly interactive. We have identified a particular functional network in Elf5 tumours involving ECM CAFs, involution iCAFs and alveolar epithelial cells that orchestrate developmental pathways similar to established involution.

#### 4. Discussion

Here, we study the molecular and cellular events acquired during metastatic progression by alteration of the composition of the mammary epithelium towards the basal epithelial-like TNBC subtype. We use a doxycycline-inducible MMTV-PyMT/Elf5 mouse model to force the differentiation of the alveolar lineage, simultaneously characterising the composition of the mammary epithelium and the TME during the acquisition of the metastatic phenotype using highly-parallel scRNAseq technology.

Conventional transcriptional analyses have classified PyMT tumours within the luminal subtype of breast cancer<sup>33,82</sup>, presumably due to the prevalent presence of the luminal progenitor cells; however our scRNAseq analyses reveal a much higher diversity of epithelial cell types which resemble all of the intrinsic subtypes of breast cancer coexisting within each tumour (Fig. 4)<sup>13,17,21,44,55,83,84</sup>. For many years, the study of the mammary gland epithelial hierarchy has provided important insights into the cell of origin of the different breast cancer subtypes<sup>32-34,82,85,86</sup>. Our high-resolution analysis has revealed intermediate “states” within the luminal progenitor compartment that show features and some commitment towards a hormone-sensing lineage (epithelial cluster 4), or alveolar lineage (epithelial cluster 2), a quality also found in the normal mammary epithelium<sup>55</sup>. The structure of the mammary epithelial hierarchy has been recently investigated using scRNAseq technology both in mice<sup>44,55,84</sup>, and in humans<sup>87</sup>. These studies support the current understanding of the presence of three main epithelial lineages both in mouse and human. Interestingly, a transcriptional definition of a cell type consistent with a stem-cell identity was not achieved, suggesting that the “stem-cell state” is not static and rather is a highly dynamic state within a transcriptional space that is strongly influenced by the cell’s niche<sup>88</sup>. These studies however support the bi-progenitor theory<sup>16,89</sup> as they identify an early basal progenitor, responsible for giving rise to the myoepithelial lineage and a luminal progenitor, which gives rise to the alveolar and hormone sensing lineages. Thus, our findings underscore the intense plasticity associated with the luminal progenitor population, and supports the current understanding of these transit-

amplifying cells as the cell of origin of basal and luminal cancers (reviewed in <sup>32</sup>) and thus contributing to the inter-tumour heterogeneity.

Our Elf5 transgenic model recapitulates the differentiation of the pregnancy associated alveolar epithelium during tumour progression <sup>7,22</sup>. Transformed alveolar cells endow tumours with a highly metastatic capacity, typical of the basal TNBC subtype. As a differentiated subtype, cell-intrinsic properties of alveolar tumours would generally indicate better outcomes <sup>90</sup>. Alveolar cells however, are centrally involved in cell-to-cell interactions (Fig. 8.) and orchestrate an intense deregulation of the TME activating metastatic cues, specifically through communication with CAFs and tumour infiltrated myeloid cells. We have previously shown that Elf5-driven alveolar tumours presented enhanced cancer immunotolerance, vascular leakiness and angiogenesis, which in turn produced a dramatic increase of metastasis, similar to that induced by pregnancy <sup>38</sup>. Our scRNAseq study reveals that cells with a transcriptional profile consistent with an alveolar cell identity are present in the wild-type PyMT tumours, although at a very low frequency (1.2%). Nevertheless the blueprint of these cells are highly represented within the LP transcriptional pool, suggesting that tumours are well equipped to stimulate a clonal expansion of alveolar cells upon the right selective conditions. This has profound therapeutic implications, in the clinical setting; patients with luminal tumours receive standard-of-care anti-estrogen therapy. In this context, an endorsed alveolar fate does represent a route of escape from endocrine therapy, as these cells are insensitive to estrogen <sup>37</sup>, subsequently giving rise to an alveolar (basal) TNBC tumour <sup>37</sup> with much poorer survival rate <sup>38</sup>. As such, Elf5 expression is associated with the Basal subtype <sup>37</sup>, and is a poor prognostic factor in Luminal A breast cancer patients <sup>38</sup>.

Despite reducing a patient's lifetime risk of developing breast cancer <sup>35,91-93</sup>, pregnancy has been shown to produce a transitory short-term increased risk in the following 5 years after pregnancy. However, there are still contrasting reports on the protective or non-protective effect of pregnancy in breast cancer, which is due in part to the poor knowledge of the molecular mechanisms involved in pregnancy-associated breast cancer (PABC). Our Elf5 MMTV-PyMT model represents much of the molecular and cellular mechanisms that are induced during pregnancy as we are able to reorganise the mammary gland hierarchy by forcing the differentiation of the

alveolar epithelium. The resultant tumours recapitulate many of the features characteristic of PABC<sup>38</sup>, and has been an invaluable model for studying the underlying molecular mechanisms associated with this aggressive type of breast cancer.

Our simultaneous observation of cancer cells and cells from the TME, has allowed us to uncover multicellular mechanism of cancer spread as a consequence of an aberrant mammary involution program. We demonstrate that Elf5 CAFs have transcriptomic and biological features of involution CAFs, and patients with high-levels of Elf5 expression that present with an involution signature have a poorer outcome. Taken together, these suggest that the pro-metastatic effects of Elf5 are driven by a mimicry involution process. In this line of evidence, involution has been previously shown to be involved in PABC<sup>36</sup> however the molecular drivers of this process have not been not fully identified. Mammary involution is a wound-healing like process that accounts for two different stages 1) Alveolar Cell apoptosis induced by milk stasis and 2) Tissue remodelling with fibroblast activation to reorganise the ECM and accommodate the cellular branching reduction and myeloid infiltration to remove all apoptotic bodies<sup>1,30</sup>. Our data presented here support the hypothesis that the chronic Elf5-forced expression induces the production of milk by alveolar cells, in a tumour, milk protein accumulation triggers the involution cascade. This mimicry involution process results in alveolar apoptosis that is rapidly restored by Elf5-driven differentiation of luminal progenitors and a chronic induction of inflammation by involution iCAFs and myeloid cells (hallmark of cancer) encompassed by ECM remodelling driven by involuting ECM-CAFs (Fig 8E).

Our scRNAseq analyses have also allowed us to identify putative molecular candidates responsible of this epithelium-fibroblast-myeloid crosstalk during mimicry involution (Fig 8). For example, we find that only alveolar epithelial cells express TGF $\beta$ 2 and 3 ligands and their receptor TGF $\beta$ R3 is expressed in involution CAFs. TGF $\beta$  is linked to tumour malignancy by affecting both cancer cells and the TME, including CAF activation and immune suppression<sup>76</sup> suggesting that this could be a specific pathway driving mimicry involution. In fact, TGF $\beta$ 3 is induced in response to milk stasis during the first stage of involution for the induction of alveolar apoptosis and TGF $\beta$  signalling is also key in the second stages of normal involution for the



induction of ECM deposition and immune suppression <sup>77</sup>. Altogether, this suggests that TGF $\beta$  signalling might be one of the pivotal pathways triggered by Elf5-alveolar cells and thus a potent pathway to be therapeutically targeted.

We also find specific pathways of crosstalk among involution CAFs, other CAF-types and the tumour-infiltrating immune system, which might be activated following this Elf5-mediated TGF $\beta$  activation. These include the expression of Cxcl12 by the involution iCAFs and IGF1 from both ECM and inflammatory involution CAFs. Cxcl12 is a stromal chemokine that attracts leukocytes through CXCR4 <sup>94</sup> and enhances cell adhesion, survival through ACKR3 <sup>95</sup>, these receptors are expressed in T/B cells and iCAFs, respectively. Interestingly, involuting mammary fibroblasts that highly express Cxcl12 induce monocyte recruitment and are associated with blockade of CD8+ T cell tumor infiltration <sup>96</sup>. Cxcl12 is also a known recruitment factor for MDSCs <sup>81</sup>. In this context, CAFs also show high expression of other classical markers for MDSC recruitment and activation, including M-CSF, IL-6 and Ccl2 <sup>81</sup> underpinning the high infiltration and activation of MDSCs previously described in Elf5-high tumours <sup>38</sup>. Dpp4 is a ligand from one of the iCAFs groups that could also build the communication bridge between Cxcl12-expressing involution iCAFs and Cxcl2 and Cxcl10-expressing myeloid cells. Dpp4 cleaves and inactivates these chemokines promoting an immunosuppressive environment by the inhibition the recruitment effector T cells <sup>97</sup> and by the promotion of chronic inflammation <sup>98</sup>. This suggests the M1-innate response from myeloid cells and fibroblasts is inhibited by Dpp4-expressing iCAFs. In addition, Costa and colleagues recently demonstrated that a subtype of CAF from human breast tumours was responsible for the increase of regulatory T cells through the expression of Dpp4 <sup>78</sup>, so the involvement of Tregs in Elf5-mediated immunosuppression might be another area to further explore. Thus, our data suggest that most of the immunosuppressive signals come from the presence of activated MDSCs in the tumour, that the main “attractor” of these immunosuppressive cells are involution CAFs that have been activated by mimicry involution signaling by alveolar cells.

Altogether our data illustrates a highly interactive TME, particularly with CAFs and myeloid cells, with cancer-differentiated cells that are pivotal initiating the events that result in tumour tolerance and metastasis as a consequence of mimicry involution. Our data highlights the relevance of targeting cancer-associated cell

species as a strategy for anticancer therapy, an approach particularly important in the context of PABC.

## **5. Acknowledgments**

We thank Dr Marina Pajic and Dr Christine Chaffer from the Garvan Institute for their review and feedback on the manuscript. This work is supported by Cancer Institute NSW Career Development Fellowship (DG00625) and Cancer Council NSW project grant (RG18-03) to DGO; National Breast Cancer Foundation postdoctoral fellowship (2013-2018, PF-13-11) and Cancer Institute NSW Career Development Fellowship (2019-2021, CDF181218) to FVM; and the National Health and Medical Research Council project grant (NHMRC 1068753) to CJO; Australian Government Research Training Program (RTP) Scholarship to AMKL and UNSW Sydney University Tuition Fee Scholarship (TFS) to YCS.

## 6. Legends to Figures

### **Figure 1. High-resolution cell composition of MMTV-PyMT tumours.**

**A)** Experimental workflow showing a schematic representation of the transgenic MMTV-PyMT/Elf5 mouse model, the number of tumours analysed and the number of cells passing the QC filter in each genotype. **B)** Distribution of variable genes defined by expression and dispersion, highlighting typical canonical markers for each of the main lineages. **C)** Heatmap showing differential expression of the top expressed genes contributing to the epithelial, stromal and immune signature. The top right panel shows the score of the signature and the percentage of cells classified to each main cell lineage analysed. The tSNE visualisation shows the coordinates of each analysed cell after dimensional reduction coloured by its main cell lineage. Roman numerals define each of the spatially formed clusters (inset). The dot plot shows the top differential markers from each of the main cell lineages and their level of expression. Bottom left panel shows a representative contour plot of the cell composition of a MMTV-PyMT tumor analysed by FACS defined by EpCAM antibodies (epithelial cells), CD45 (leukocytes) and double negative cells (stroma). Violin plot shows distribution of the number of genes per cell in each of the main cell lineages. **D)** Feature tSNE plots showing the expression of typical canonical markers of each of the main cell lineages.

### **Figure 2. PyMT tumours show intense cell heterogeneity in each of the main cell lineage compartments.**

**A)** tSNE plot showing cell clusters defined in each of the main cell lineages and their relative frequency. Far right column depicts the main cell lineage of origin for each cluster, showing 6 clusters of epithelial origin, 5 immune and 5 stromal. **B)** Heatmap showing the top differentially expressed genes that define each of the clusters. **C)** Cluster tree modelling the phylogenetic relationship of the different clusters in each of the main cell types compartments at different clustering resolutions. Dashed red line shows the resolution chosen. Coloured circles in the cluster tree represent the origin of the clusters represented in the tSNE plot shown in panel A, the full cluster tree can be found in SuppFig 4A. **D)** Visualisation of the top differential genes for each of the defined clusters in the immune lineage (top) and in the stroma (bottom). **E)** Cell identification using score values for each of the metasignatures of the xCell algorithm in the immune and stromal compartment divided by cluster.

### **Figure 3. Annotation of the cancer epithelial cell diversity in PyMT tumours.**

**A)** tSNE visualisation of the cell groups defined by k-means clustering analysis. Bottom panel shows a gene-expression heatmap of the top expressed genes for each cell cluster. **B)** Distribution of cells by genotype in the defined tSNE dimensions. The Sankey diagram shows the contribution of each of the genotypes to the cell clusters. Cluster numbers are coloured by the dominant genotype (>2-fold cell content of one genotype), Elf5 (red), WT (green). Violin plots showing Elf5 (upper plot) and PyMT

(bottom plot) expression in each cell cluster. **C)** Scatter plot showing FACS data to define the % alveolar versus luminal progenitors using canonical antibodies that define the epithelial mammary gland hierarchy (EpCAM, CD49f, Sca1 and CD49b), in PyMT tumours. Each dot represents one animal (WT n = 6 and Elf5 n = 5); bottom panels are representative FACS plots of one of the replicates for each genotype. **D)** Dot plot representing the expression level (red jet) and the number of expressing cells (dot size) of the transcriptional mammary gland epithelium markers in each PyMT cluster. These marker genes were grouped according to each mammary epithelial cell type as defined by Bach, et al.: Hormone sensing differentiated (Hs-d, dark pink), Hormone-sensing progenitor (Hs-p, light pink), Luminal progenitor (LP, orange), Alveolar differentiated (Alv-d, dark red), Alveolar progenitor (Alv-p, light red), Basal (B, light purple), Myoepithelial (Myo, dark purple), Undifferentiated (Multi, light blue). **E)** Dot plot of the expression level of the top differential marker genes in each of the PyMT clusters coloured by genotype. The yellow rectangles highlight the top genes represented by each cluster. The size of the dots represents the percentage of cells/cluster that express each particular gene (pct. exp) and the colour gradient shows the level of expression for each gene/cluster. Note both colours are shown only when the cluster was populated similarly by both genotypes according to panel B.

#### **Figure 4. Lineage trajectory of PyMT cancer cells.**

**A)** Pseudotiming alignment of the PyMT cancer epithelial cells along the gene signatures that define the main lineages of the mammary gland epithelial hierarchy using the DDRTree method in Monocle2. Right panels show the distribution of the cell states by genotype. **B)** Projection of the states defined by pseudotime analysis into tSNE clustering coordinates overall and per pseudotime state (miniaturised tSNE plots). Right panels show the projection by genotype. **C)** Overlay representation of the cell identities (k-means clustering as per Fig.3) and cell lineage identification (pseudotime analysis), the proportion of cells in each cluster that belong to each defined state is shown in the bar chart (right hand side). **D)** Enrichment analysis (GSVA score) for the gene signatures that define the main mammary gland lineages: Basal, Luminal Progenitor (LP) and Mature Luminal (ML) for each of the clusters. Bottom panels show the expression of each of the gene signatures at single cell resolution. The top bar shows the assigned mammary epithelial cell type as per section C. **E)** Frequency of the different cell lineages in each genotype. **F)** Cluster tree showing the phylogeny relationship of the different clusters. Red arrow shows the resolution used (0.7). **G)** Illustration of cell diversity of PyMT tumours based on the canonical structure of the mammary gland epithelial lineages.

#### **Figure 5. Functional validation of cancer related features associated to PyMT/Elf5 tumours.**

**A)** Cell cycle stages of the PyMT cancer cells as defined by gene expression signatures using tSNE coordinates and their deconvolution (middle panel). Circled area shows the cycling cluster (C5 in Fig. 3) characterised by a total absence of G1 cells. The quantification of the proportion of cells in each stage grouped by genotype

is shown in the bar chart. **B)** Enrichment GSVA analysis of gene expression metasignatures of cancer-related and Elf5-related hallmarks associated to PyMT/WT (green) and /Elf5 (red) tumours. **C)** tSNE representation of the EMT gene expression metasignatures at the single cell level. Right panel shows a western blot of canonical EMT markers (E-Cadh, E-Cadherin and Vim, vimentin) on PyMT/WT or ELF5 full tumour lysates. Note: the two images correspond to the same western blot gel cropped to show the relevant samples. **D)** Hypoxia metasignatures at the single cell level is shown in the tSNE plot, bottom panel shows a bar plot of the extension of the hypoxic areas in PyMT/WT (green) and /Elf5 (red) tissue sections (tumours and lung metastasis) stained using IHC based on hypoxyprobe binding, representative images are shown in the right panels. **E)** Lactation and Late Involution (stage 4, S4) metasignatures at the single cell level is shown in the tSNE plots. Pictures show IHC with an anti-milk antibody in tissue sections from a lactating mammary gland at established lactation compared with a mammary gland from an aged-matched virgin mouse; and in PyMT/WT and Elf5 tumours. **F)** Kaplan-Meier survival curves based on Elf5 expression using the METABRIC cohort. Patient were segregated according to Elf5 expression levels based on tertiles. Elf5-high patients (red) were defined as the top-tertile and Elf5-low patients (green) as the bottom-tertile, Log-rank p values <0.05 are shown in red. The bar chart (bottom panel) corresponds to the distribution of the PAM50 classified breast cancer subtypes in the top and bottom Elf5 expressing tertile of patients. **G)** Upper panel: Survival analysis (Kaplan-Meier curves) for the expression of Elf5 (left hand side) and the Involution metasignatures (right hand side) in luminal breast cancer patients as per section F) Bottom panel: Kaplan-Meier survival curves for the late involution metasignatures in Elf5-high patients (left hand side, ELF5-H) and Elf5-low patients (right hand side, ELF5-L). Each group of patients (ELF5-H and ELF5-L) were segregated according to tertiles for the combined expression levels of the genes from the involution metasignatures: Green, inv low, bottom third; Blue, inv mid, middle third and Red, inv high, top third. Log-rank p values <0.05 are shown in red.

**Figure 6. Annotation of the cancer-associated fibroblasts diversity in PyMT tumours.** **A)** tSNE plot groups defined by k-means clustering analysis showing a total of three cell clusters defined within the fibroblast subtype. **B)** Metasignatures of Cancer-associated fibroblast (CAF) signature (upper plot) and myfibroblasts (bottom panel) plotted in the fibroblast tSNE. The gene list of each metasignatures was manually annotated from published scRNAseq data in human tumours<sup>64,65</sup>. **C)** Desmoplastic (upper plot), Inflammatory (middle plot) and Contractile (bottom plot) metasignatures plotted in the fibroblast tSNEs from public data<sup>67</sup>. **D)** Violin plots displaying marker genes for each of the three fibroblast clusters defined in section A: ECM-CAFs (0), immune-CAFs (iCAFs, 1) and myofibroblasts (2). **E)** Upper plot: tSNE illustration of the involution signature from<sup>62</sup>. Middle plot: tSNE plot defined by k-means clustering analysis at resolution 1 of the fibroblast population showing a total of nine cell clusters. Bottom section: Violin plots on these nine cell clusters of the three out of four genes from the involution signature. **F)** Upper plot: Distribution

of fibroblasts by genotype (Elf5: red), WT: green) in the defined tSNE dimensions. Bottom plot: Sankey diagram showing the contribution percentage of each of the genotypes to the cell clusters. Cluster numbers are coloured by the dominant genotype (>2-fold cell content of one genotype), Elf5 (red), WT (green). **G**) GSVA enrichment analysis of involuting mammary fibroblast metasignatures associated to PyMT/WT and /Elf5 tumours. Violin plots of Cxcl12, Mmp3 and Colla1 genes in all fibroblasts of each genotype. PyMT/WT (green) PyMT/Elf5 (red).

**Figure 7. Functional validation of ECM remodelling associated with CAFs in PyMT/WT and /Elf5 tumours.**

**A)** Representative bright field images and quantification of total coverage of picrosirius red-stained PyMT/WT and PyMT/ELF5 tumours sections n=4 mice per genotype with 10 regions of interest (ROI) per tumour. **B)** Representative maximum intensity projections of SHG signal and quantification of SHG signal intensity at depth ( $\mu\text{m}$ ) and at peak in PyMT/WT and PyMT/ELF5 tumour sections, n=6 mice per genotype with 6 ROI per tumour. **C)** Polarised light imaging of picrosirius red stained PyMT/WT and PyMT/ELF5 tumour sections, and quantification of total signal intensity acquired via polarised light. Thick remodelled fibres/high birefringence (red-orange), medium birefringence (yellow) and less remodelled fibres/low birefringence (green) n=4 mice per genotype with 10 ROI. **D)** SHG images of PyMT/WT and PyMT/ELF5 tumours assessed for differences in fibre orientation angle and quantification of frequency of fibre alignment ranging from the peak alignment. Different colours correspond to specific angles of orientation n=6 PyMT/WT and n=4 PyMT/ELF5. Inset shows the cumulative frequency of fibre alignment +/- 10 degrees from peak.

**Figure 8. Interactome of PyMT tumours**

**A)** Heatmap of the cell-cell interactions of all cell types from PYMT tumours based on Cellphone DB. Cell classification was based on the annotation from Figure 3 for the epithelial compartment; from Figure 6 at resolution 1 in the case of fibroblasts, where the cycling cluster (Cluster 6) and the residual cluster of 15 cells (Cluster 8) were removed; in addition, Clusters 7 and 2 were considered as a sole group annotated as “Myofibroblasts”. The rest of the cells from the immune and stromal compartments were classified according to the annotation done in Figure 2 (See Supplementary Figure 9C for global annotation). The Scale at the right-hand side shows the interaction strength based on the statistical framework included in CellphoneDB (count of statistically significant ( $p < 0.01$ ) interactions above mean = 0.3, see methods). **B)** Graphical representation of all significant cell-cell interactions identified by CellphoneDB using the parameters of more than 10 significant interactions with a mean score greater than 0.3, number cut as more than 10 connections and number split 10. The red circles correspond to the cell types from the epithelial compartment; the blue triangles represent the cells from the stromal compartment and the green squares are the cells from the immune compartment. The size of geometric figures is relative to the number of cells involved in the interactions

(display as count). Different number splits were applied to establish the most significant interactions for the fibroblast and immune cell types. Fibroblast showed the strongest interactions (highlighted as blue lines) when a number split of 67 (1<sup>st</sup> Tier) and 50 (2<sup>nd</sup> Tier) were used. The immune system showed weaker interactions (highlighted as green lines) at a number split of 15 (3<sup>rd</sup> Tier) and 11 (4<sup>th</sup> Tier). **C)** Representative dot plots of ligand (no background)-receptor (red background) pairs. The size of the circles is relative to the number of cells within each annotated cluster that showed a positive expression of each gene and the blue gradient represents the average scaled expression. **D)** Violin plots of genes from canonical pathways known to recruit and expand MDSCs. **E)** Proposed molecular model of involution mimicry driven by Elf5 where CAFs and MDSCs are the major cell types involved.

## 7. References

1. Inman, J.L., Robertson, C., Mott, J.D. & Bissell, M.J. Mammary gland development: cell fate specification, stem cells and the microenvironment. *Development* **142**, 1028-42 (2015).
2. Sakakura, T., Kusano, I., Kusakabe, M., Inaguma, Y. & Nishizuka, Y. Biology of mammary fat pad in fetal mouse: capacity to support development of various fetal epithelia in vivo. *Development* **100**, 421-30 (1987).
3. Richert, M.M., Schwertfeger, K.L., Ryder, J.W. & Anderson, S.M. An atlas of mouse mammary gland development. *J Mammary Gland Biol Neoplasia* **5**, 227-41 (2000).
4. Brisken, C. & O'Malley, B. Hormone action in the mammary gland. *Cold Spring Harb Perspect Biol* **2**, a003178 (2010).
5. Asselin-Labat, M.L. *et al.* Control of mammary stem cell function by steroid hormone signalling. *Nature* **465**, 798-802 (2010).
6. Sleeman, K.E. *et al.* Dissociation of estrogen receptor expression and in vivo stem cell activity in the mammary gland. *J Cell Biol* **176**, 19-26 (2007).
7. Lee, H.J. *et al.* Progesterone drives mammary secretory differentiation via RankL-mediated induction of Elf5 in luminal progenitor cells. *Development* **140**, 1397-401 (2013).
8. Schramek, D. *et al.* Osteoclast differentiation factor RANKL controls development of progestin-driven mammary cancer. *Nature* **468**, 98-102 (2010).
9. Joshi, P.A. *et al.* Progesterone induces adult mammary stem cell expansion. *Nature* **465**, 803-7 (2010).
10. Belet, M. *et al.* Two distinct mechanisms underlie progesterone-induced proliferation in the mammary gland. *Proc Natl Acad Sci U S A* **107**, 2989-94 (2010).
11. Oakes, S.R., Gallego-Ortega, D. & Ormandy, C.J. The mammary cellular hierarchy and breast cancer. *Cell Mol Life Sci* **71**, 4301-24 (2014).
12. Shehata, M. *et al.* Phenotypic and functional characterisation of the luminal cell hierarchy of the mammary gland. *Breast Cancer Res* **14**, R134 (2012).
13. Van Keymeulen, A. *et al.* Distinct stem cells contribute to mammary gland development and maintenance. *Nature* **479**, 189-93 (2011).
14. de Visser, K.E. *et al.* Developmental stage-specific contribution of LGR5(+) cells to basal and luminal epithelial lineages in the postnatal mammary gland. *J Pathol* **228**, 300-9 (2012).
15. Sale, S., Lafkas, D. & Artavanis-Tsakonas, S. Notch2 genetic fate mapping reveals two previously unrecognized mammary epithelial lineages. *Nat Cell Biol* **15**, 451-60 (2013).
16. Rios, A.C., Fu, N.Y., Lindeman, G.J. & Visvader, J.E. In situ identification of bipotent stem cells in the mammary gland. *Nature* **506**, 322-7 (2014).
17. Fu, N.Y. *et al.* Identification of quiescent and spatially restricted mammary stem cells that are hormone responsive. *Nat Cell Biol* **19**, 164-176 (2017).
18. Stingl, J. *et al.* Purification and unique properties of mammary epithelial stem cells. *Nature* **439**, 993-7 (2006).
19. van Amerongen, R., Bowman, A.N. & Nusse, R. Developmental stage and time dictate the fate of Wnt/beta-catenin-responsive stem cells in the mammary gland. *Cell Stem Cell* **11**, 387-400 (2012).



20. Shackleton, M. *et al.* Generation of a functional mammary gland from a single stem cell. *Nature* **439**, 84-8 (2006).
21. Wang, D. *et al.* Identification of multipotent mammary stem cells by protein C receptor expression. *Nature* **517**, 81-4 (2015).
22. Oakes, S.R. *et al.* The Ets transcription factor Elf5 specifies mammary alveolar cell fate. *Genes Dev* **22**, 581-6 (2008).
23. Gallego-Ortega, D., Samantha R Oakes, Heather J Lee, Catherine L Piggin, Christopher J Ormandy. ELF5, normal mammary development and the heterogeneous phenotypes of breast cancer. *Breast Cancer Management* **2**, 489-498 (2013).
24. Nevalainen, M.T., Xie, J., Bubendorf, L., Wagner, K.U. & Rui, H. Basal activation of transcription factor signal transducer and activator of transcription (Stat5) in nonpregnant mouse and human breast epithelium. *Mol Endocrinol* **16**, 1108-24 (2002).
25. Liu, X., Robinson, G.W., Gouilleux, F., Groner, B. & Hennighausen, L. Cloning and expression of Stat5 and an additional homologue (Stat5b) involved in prolactin signal transduction in mouse mammary tissue. *Proc Natl Acad Sci U S A* **92**, 8831-5 (1995).
26. Reichenstein, M., Rauner, G. & Barash, I. Conditional repression of STAT5 expression during lactation reveals its exclusive roles in mammary gland morphology, milk-protein gene expression, and neonate growth. *Mol Reprod Dev* **78**, 585-96 (2011).
27. Ormandy, C.J. *et al.* Investigation of the transcriptional changes underlying functional defects in the mammary glands of prolactin receptor knockout mice. *Recent Prog Horm Res* **58**, 297-323 (2003).
28. Harris, J. *et al.* Socs2 and elf5 mediate prolactin-induced mammary gland development. *Mol Endocrinol* **20**, 1177-87 (2006).
29. Asselin-Labat, M.L. *et al.* Gata-3 is an essential regulator of mammary-gland morphogenesis and luminal-cell differentiation. *Nat Cell Biol* **9**, 201-9 (2007).
30. Stein, T., Salomonis, N. & Gusterson, B.A. Mammary gland involution as a multi-step process. *J Mammary Gland Biol Neoplasia* **12**, 25-35 (2007).
31. Schedin, P., O'Brien, J., Rudolph, M., Stein, T. & Borges, V. Microenvironment of the involuting mammary gland mediates mammary cancer progression. *J Mammary Gland Biol Neoplasia* **12**, 71-82 (2007).
32. Visvader, J.E. Cells of origin in cancer. *Nature* **469**, 314-22 (2011).
33. Lim, E. *et al.* Transcriptome analyses of mouse and human mammary cell subpopulations reveal multiple conserved genes and pathways. *Breast Cancer Res* **12**, R21 (2010).
34. Molyneux, G. & Smalley, M.J. The cell of origin of BRCA1 mutation-associated breast cancer: a cautionary tale of gene expression profiling. *J Mammary Gland Biol Neoplasia* **16**, 51-5 (2011).
35. Schedin, P. Pregnancy-associated breast cancer and metastasis. *Nat Rev Cancer* **6**, 281-91 (2006).
36. Lyons, T.R. *et al.* Postpartum mammary gland involution drives progression of ductal carcinoma in situ through collagen and COX-2. *Nat Med* **17**, 1109-15 (2011).
37. Kalyuga, M. *et al.* ELF5 suppresses estrogen sensitivity and underpins the acquisition of antiestrogen resistance in luminal breast cancer. *PLoS Biol* **10**, e1001461 (2012).

38. Gallego-Ortega, D. *et al.* ELF5 Drives Lung Metastasis in Luminal Breast Cancer through Recruitment of Gr1<sup>+</sup> CD11b<sup>+</sup> Myeloid-Derived Suppressor Cells. *PLoS Biol* **13**, e1002330 (2015).
39. Macosko, E.Z. *et al.* Highly Parallel Genome-wide Expression Profiling of Individual Cells Using Nanoliter Droplets. *Cell* **161**, 1202-1214 (2015).
40. Grabherr, M.G. *et al.* Full-length transcriptome assembly from RNA-Seq data without a reference genome. *Nat Biotechnol* **29**, 644-52 (2011).
41. Butler, A., Hoffman, P., Smibert, P., Papalexi, E. & Satija, R. Integrating single-cell transcriptomic data across different conditions, technologies, and species. *Nat Biotechnol* **36**, 411-420 (2018).
42. Zappia, L. & Oshlack, A. Clustering trees: a visualization for evaluating clusterings at multiple resolutions. *Gigascience* **7**(2018).
43. Trapnell, C. *et al.* The dynamics and regulators of cell fate decisions are revealed by pseudotemporal ordering of single cells. *Nat Biotechnol* **32**, 381-386 (2014).
44. Pal, B. *et al.* Construction of developmental lineage relationships in the mouse mammary gland by single-cell RNA profiling. *Nat Commun* **8**, 1627 (2017).
45. Vento-Tormo, R. *et al.* Single-cell reconstruction of the early maternal-fetal interface in humans. *Nature* **563**, 347-353 (2018).
46. Hanzelmann, S., Castelo, R. & Guinney, J. GSEA: gene set variation analysis for microarray and RNA-seq data. *BMC Bioinformatics* **14**, 7 (2013).
47. Subramanian, A. *et al.* Gene set enrichment analysis: a knowledge-based approach for interpreting genome-wide expression profiles. *Proc Natl Acad Sci U S A* **102**, 15545-50 (2005).
48. Mootha, V.K. *et al.* PGC-1 $\alpha$ -responsive genes involved in oxidative phosphorylation are coordinately downregulated in human diabetes. *Nat Genet* **34**, 267-73 (2003).
49. Pereira, B. *et al.* The somatic mutation profiles of 2,433 breast cancers refines their genomic and transcriptomic landscapes. *Nat Commun* **7**, 11479 (2016).
50. Cazet, A.S. *et al.* Targeting stromal remodeling and cancer stem cell plasticity overcomes chemoresistance in triple negative breast cancer. *Nat Commun* **9**, 2897 (2018).
51. Vennin, C. *et al.* Transient tissue priming via ROCK inhibition uncouples pancreatic cancer progression, sensitivity to chemotherapy, and metastasis. *Sci Transl Med* **9**(2017).
52. Law, A.M.K. *et al.* Andy's Algorithms: new automated digital image analysis pipelines for FIJI. *Sci Rep* **7**, 15717 (2017).
53. Oakes, S.R. *et al.* A mutation in the viral sensor 2'-5'-oligoadenylate synthetase 2 causes failure of lactation. *PLoS Genet* **13**, e1007072 (2017).
54. Aran, D., Hu, Z. & Butte, A.J. xCell: digitally portraying the tissue cellular heterogeneity landscape. *Genome Biol* **18**, 220 (2017).
55. Bach, K. *et al.* Differentiation dynamics of mammary epithelial cells revealed by single-cell RNA sequencing. *Nat Commun* **8**, 2128 (2017).
56. Prater, M.D. *et al.* Mammary stem cells have myoepithelial cell properties. *Nat Cell Biol* **16**, 942-50, 1-7 (2014).
57. Chakrabarti, R. *et al.* Elf5 inhibits the epithelial-mesenchymal transition in mammary gland development and breast cancer metastasis by transcriptionally repressing Snail2. *Nat Cell Biol* **14**, 1212-22 (2012).
58. Tirosh, I. *et al.* Dissecting the multicellular ecosystem of metastatic melanoma by single-cell RNA-seq. *Science* **352**, 189-96 (2016).

59. Stein, T. *et al.* Involution of the mouse mammary gland is associated with an immune cascade and an acute-phase response, involving LBP, CD14 and STAT3. *Breast Cancer Res* **6**, R75-91 (2004).
60. Curtis, C. *et al.* The genomic and transcriptomic architecture of 2,000 breast tumours reveals novel subgroups. *Nature* **486**, 346-52 (2012).
61. Watson, C.J. Involution: apoptosis and tissue remodelling that convert the mammary gland from milk factory to a quiescent organ. *Breast Cancer Res* **8**, 203 (2006).
62. Guo, Q. *et al.* Physiologically activated mammary fibroblasts promote postpartum mammary cancer. *JCI Insight* **2**, e89206 (2017).
63. Cortez, E., Roswall, P. & Pietras, K. Functional subsets of mesenchymal cell types in the tumor microenvironment. *Semin Cancer Biol* **25**, 3-9 (2014).
64. Lambrechts, D. *et al.* Phenotype molding of stromal cells in the lung tumor microenvironment. *Nat Med* **24**, 1277-1289 (2018).
65. Puram, S.V. *et al.* Single-Cell Transcriptomic Analysis of Primary and Metastatic Tumor Ecosystems in Head and Neck Cancer. *Cell* **171**, 1611-1624 e24 (2017).
66. Kalluri, R. The biology and function of fibroblasts in cancer. *Nat Rev Cancer* **16**, 582-98 (2016).
67. Davidson, S. *et al.* Single-cell RNA sequencing reveals a dynamic stromal niche within the evolving tumour microenvironment. *bioRxiv* (2018).
68. Bochet, L. *et al.* Adipocyte-derived fibroblasts promote tumor progression and contribute to the desmoplastic reaction in breast cancer. *Cancer Res* **73**, 5657-68 (2013).
69. Lorenz, K. *et al.* Multilineage differentiation potential of human dermal skin-derived fibroblasts. *Exp Dermatol* **17**, 925-32 (2008).
70. Hillers, L.E., D'Amato, J.V., Chamberlin, T., Paderta, G. & Arendt, L.M. Obesity-Activated Adipose-Derived Stromal Cells Promote Breast Cancer Growth and Invasion. *Neoplasia* **20**, 1161-1174 (2018).
71. Zwick, R.K. *et al.* Adipocyte hypertrophy and lipid dynamics underlie mammary gland remodeling after lactation. *Nat Commun* **9**, 3592 (2018).
72. Amara, U. *et al.* Interaction between the coagulation and complement system. *Adv Exp Med Biol* **632**, 71-9 (2008).
73. Lilla, J.N., Joshi, R.V., Craik, C.S. & Werb, Z. Active plasma kallikrein localizes to mast cells and regulates epithelial cell apoptosis, adipocyte differentiation, and stromal remodeling during mammary gland involution. *J Biol Chem* **284**, 13792-803 (2009).
74. Martinson, H.A., Jindal, S., Durand-Rougely, C., Borges, V.F. & Schedin, P. Wound healing-like immune program facilitates postpartum mammary gland involution and tumor progression. *Int J Cancer* **136**, 1803-13 (2015).
75. O'Brien, J. *et al.* Alternatively activated macrophages and collagen remodeling characterize the postpartum involuting mammary gland across species. *Am J Pathol* **176**, 1241-55 (2010).
76. Bellomo, C., Caja, L. & Moustakas, A. Transforming growth factor beta as regulator of cancer stemness and metastasis. *Br J Cancer* **115**, 761-9 (2016).
77. Flanders, K.C. & Wakefield, L.M. Transforming growth factor-(beta)s and mammary gland involution; functional roles and implications for cancer progression. *J Mammary Gland Biol Neoplasia* **14**, 131-44 (2009).
78. Costa, A. *et al.* Fibroblast Heterogeneity and Immunosuppressive Environment in Human Breast Cancer. *Cancer Cell* **33**, 463-479 e10 (2018).

79. Blackstock, C.D. *et al.* Insulin-like growth factor-1 increases synthesis of collagen type I via induction of the mRNA-binding protein LARP6 expression and binding to the 5' stem-loop of COL1a1 and COL1a2 mRNA. *J Biol Chem* **289**, 7264-74 (2014).
80. Valdes-Mora, F. *et al.* Single-Cell Transcriptomics in Cancer Immunobiology: The Future of Precision Oncology. *Front Immunol* **9**, 2582 (2018).
81. Sevko, A. & Umansky, V. Myeloid-derived suppressor cells interact with tumors in terms of myelopoiesis, tumorigenesis and immunosuppression: thick as thieves. *J Cancer* **4**, 3-11 (2013).
82. Lim, E. *et al.* Aberrant luminal progenitors as the candidate target population for basal tumor development in BRCA1 mutation carriers. *Nat Med* **15**, 907-13 (2009).
83. Van Keymeulen, A. *et al.* Lineage-Restricted Mammary Stem Cells Sustain the Development, Homeostasis, and Regeneration of the Estrogen Receptor Positive Lineage. *Cell Rep* **20**, 1525-1532 (2017).
84. Wuidart, A. *et al.* Early lineage segregation of multipotent embryonic mammary gland progenitors. *Nat Cell Biol* **20**, 666-676 (2018).
85. Prat, A. *et al.* Phenotypic and molecular characterization of the claudin-low intrinsic subtype of breast cancer. *Breast Cancer Res* **12**, R68 (2010).
86. Visvader, J.E. & Stingl, J. Mammary stem cells and the differentiation hierarchy: current status and perspectives. *Genes Dev* **28**, 1143-58 (2014).
87. Nguyen, Q.H. *et al.* Profiling human breast epithelial cells using single cell RNA sequencing identifies cell diversity. *Nat Commun* **9**, 2028 (2018).
88. Bland, P. & Howard, B.A. Mammary lineage restriction in development. *Nat Cell Biol* **20**, 637-639 (2018).
89. Lilja, A.M. *et al.* Clonal analysis of Notch1-expressing cells reveals the existence of unipotent stem cells that retain long-term plasticity in the embryonic mammary gland. *Nat Cell Biol* **20**, 677-687 (2018).
90. Jogi, A., Vaapil, M., Johansson, M. & Pahlman, S. Cancer cell differentiation heterogeneity and aggressive behavior in solid tumors. *Ups J Med Sci* **117**, 217-24 (2012).
91. Janerich, D.T. & Hoff, M.B. Evidence for a crossover in breast cancer risk factors. *Am J Epidemiol* **116**, 737-42 (1982).
92. MacMahon, B., Cole, P. & Brown, J. Etiology of human breast cancer: a review. *J Natl Cancer Inst* **50**, 21-42 (1973).
93. Nichols, H.B. *et al.* Breast Cancer Risk After Recent Childbirth: A Pooled Analysis of 15 Prospective Studies. *Ann Intern Med* (2018).
94. Mohle, R. *et al.* The chemokine receptor CXCR-4 is expressed on CD34+ hematopoietic progenitors and leukemic cells and mediates transendothelial migration induced by stromal cell-derived factor-1. *Blood* **91**, 4523-30 (1998).
95. Burns, J.M. *et al.* A novel chemokine receptor for SDF-1 and I-TAC involved in cell survival, cell adhesion, and tumor development. *J Exp Med* **203**, 2201-13 (2006).
96. Guo, Q., Betts, C., Pennock, N., Mitchell, E. & Schedin, P. Mammary Gland Involution Provides a Unique Model to Study the TGF-beta Cancer Paradox. *J Clin Med* **6**(2017).
97. Barreira da Silva, R. *et al.* Dipeptidylpeptidase 4 inhibition enhances lymphocyte trafficking, improving both naturally occurring tumor immunity and immunotherapy. *Nat Immunol* **16**, 850-8 (2015).

98. Schurmann, C. *et al.* The dipeptidyl peptidase-4 inhibitor linagliptin attenuates inflammation and accelerates epithelialization in wounds of diabetic ob/ob mice. *J Pharmacol Exp Ther* **342**, 71-80 (2012).

Table 1. Functional annotation of each cell cluster from the tumour epithelium.

| Mammary lineage     | Cluster number       | HALLMARK<br>White bg: positive enrichment<br>Gray bg: negative enrichment | Function                     |
|---------------------|----------------------|---------------------------------------------------------------------------|------------------------------|
| Undifferentiated    | 0                    | Hedgehog Signalling                                                       | Cell proliferation           |
|                     |                      | E2F Targets                                                               |                              |
|                     |                      | Mitotic Spindle                                                           |                              |
|                     |                      | G2M Checkpoint                                                            |                              |
|                     |                      | Reactive Oxygen Species Pathway                                           | Inflammation/Immune Response |
|                     |                      | IL6 JAK STAT3 Signalling                                                  |                              |
|                     |                      | Allograft Rejection                                                       |                              |
|                     |                      | Interferon Gamma Response                                                 |                              |
|                     |                      | Interferon Alpha Response                                                 |                              |
|                     |                      | Inflammatory Response                                                     |                              |
|                     |                      | Xenobiotic Metabolism                                                     |                              |
|                     |                      | Angiogenesis                                                              | Interaction with TME         |
|                     |                      | Notch Signalling                                                          | Cell differentiation         |
|                     |                      | Epithelial Mesenchymal Transition                                         | EMT                          |
| Luminal progenitors | 2                    | Notch signalling                                                          | Cell Differentiation         |
|                     |                      | TGF beta Signalling                                                       |                              |
|                     |                      | Mitotic Spindle                                                           |                              |
|                     |                      | G2M Checkpoint                                                            | Cell Proliferation           |
|                     |                      | E2F Targets                                                               |                              |
|                     |                      | Myc Targets v1                                                            |                              |
|                     |                      | Cholesterol Homeostasis                                                   | Cell Metabolism              |
|                     |                      | Bile acid metabolism                                                      |                              |
|                     |                      | Peroxisome                                                                |                              |
|                     | 3                    | Interferon Alpha Response                                                 | Immune response              |
|                     |                      | Interferon Gamma Response                                                 |                              |
|                     |                      | Androgen Response                                                         | Hormone Response             |
|                     |                      | Estrogen Response Late                                                    |                              |
|                     |                      | Estrogen Response Early                                                   |                              |
|                     |                      | IL2 STAT5 Signalling                                                      |                              |
|                     |                      | Hypoxia                                                                   | Interaction with TME         |
|                     |                      | Angiogenesis                                                              |                              |
|                     |                      | Coagulation                                                               | Inflammation                 |
|                     |                      | Inflammatory Response                                                     |                              |
|                     |                      | Reactive Oxygen Species Pathway                                           |                              |
|                     |                      | Complement                                                                |                              |
|                     |                      | Epithelial Mesenchymal Transition                                         | EMT                          |
|                     |                      | Mitotic Spindle                                                           | Cell Proliferation           |
| G2M Checkpoint      |                      |                                                                           |                              |
| E2F Targets         |                      |                                                                           |                              |
| Myc Targets v1      |                      |                                                                           |                              |
| Myc Targets v2      |                      |                                                                           |                              |
| Hedgehog Signalling |                      |                                                                           |                              |
| TGF beta Signalling | Cell Differentiation |                                                                           |                              |

|                           |                 |                                   |                      |
|---------------------------|-----------------|-----------------------------------|----------------------|
|                           |                 | Myogenesis                        |                      |
|                           | 4               | Cholesterol Homeostasis           | Cell Metabolism      |
|                           |                 | Fatty Acid metabolism             |                      |
|                           |                 | Heme metabolism                   |                      |
|                           |                 | Epithelial Mesenchymal Transition | EMT                  |
|                           |                 | TNFA signalling via NFKB          | Inflammation         |
|                           |                 | IL6 JAK STAT3 Signalling          |                      |
|                           |                 | Complement                        |                      |
|                           |                 | Coagulation                       |                      |
| Alveolar lineage          | 1               | IL6 JAK STAT3 Signalling          | Inflammation         |
|                           |                 | Complement                        |                      |
|                           |                 | Interferon Alpha Response         |                      |
|                           |                 | Estrogen Response Early           | Hormone Response     |
|                           |                 | Estrogen Response Late            |                      |
|                           |                 | Epithelial Mesenchymal Transition | EMT                  |
|                           |                 | Mitotic Spindle                   | Cell proliferation   |
|                           |                 | G2M Checkpoint                    |                      |
|                           |                 | E2F Targets                       |                      |
|                           |                 | Myc Targets v1                    |                      |
|                           |                 | Myc Targets v2                    |                      |
|                           |                 | Hedgehog Signalling               |                      |
|                           |                 | Interferon Gamma Response         | Immune Response      |
|                           | 6               | IL6 JAK STAT3 Signalling          | Inflammation         |
|                           |                 | Complement                        |                      |
|                           |                 | Coagulation                       |                      |
|                           |                 | Cholesterol Homeostasis           | Cell Metabolism      |
|                           |                 | Hypoxia                           | Interaction with TME |
|                           |                 | Angiogenesis                      |                      |
|                           |                 | Reactive Oxygen Species Pathway   | Oxidative stress     |
|                           |                 | Estrogen Response Early           | Hormone Response     |
|                           |                 | Epithelial Mesenchymal Transition | EMT                  |
|                           |                 | Mitotic Spindle                   | Cell proliferation   |
|                           |                 | G2M Checkpoint                    |                      |
|                           |                 | E2F Targets                       |                      |
|                           |                 | Myc Targets v1                    |                      |
|                           |                 | Hedgehog Signalling               |                      |
|                           |                 | Interferon Gamma Response         |                      |
| Interferon Alpha Response | Immune Response |                                   |                      |
| Hormone sensing lineage   | 9               | Androgen Response                 | Hormone Response     |
|                           |                 | Estrogen Response Late            |                      |
|                           |                 | Estrogen Response Early           |                      |
|                           |                 | IL2 STAT5 Signalling              |                      |
|                           |                 | Hypoxia                           | Interaction with TME |
|                           |                 | Angiogenesis                      |                      |
|                           |                 | Coagulation                       | Inflammation         |
|                           |                 | Complement                        |                      |

|                                    |                                   |                                 |                      |
|------------------------------------|-----------------------------------|---------------------------------|----------------------|
|                                    |                                   | Inflammatory Response           |                      |
|                                    |                                   | IL6 JAK STAT3 Signalling        |                      |
|                                    |                                   | Allograft Rejection             |                      |
|                                    |                                   | Interferon Gamma Response       |                      |
|                                    |                                   |                                 |                      |
| Basal/Myoe<br>pithelial<br>lineage | 7                                 | Complement                      | Inflammation         |
|                                    |                                   | Coagulation                     |                      |
|                                    |                                   | Allograft Rejection             |                      |
|                                    |                                   | Inflammatory Response           |                      |
|                                    |                                   | Reactive Oxygen Species Pathway |                      |
|                                    |                                   | IL6 JAK STAT3 Signalling        |                      |
|                                    |                                   | Interferon Gamma Response       |                      |
|                                    | Angiogenesis                      | Interaction with TME            |                      |
|                                    | Hypoxia                           | Cell differentiation            |                      |
|                                    | Myogenesis                        |                                 |                      |
|                                    | Notch Signalling                  |                                 |                      |
|                                    | Epithelial Mesenchymal Transition | EMT                             |                      |
|                                    | 8                                 | Notch Signalling                | Cell differentiation |
|                                    |                                   | TGF beta Signalling             |                      |
| Myogenesis                         |                                   |                                 |                      |
| Epithelial Mesenchymal Transition  |                                   | EMT                             |                      |



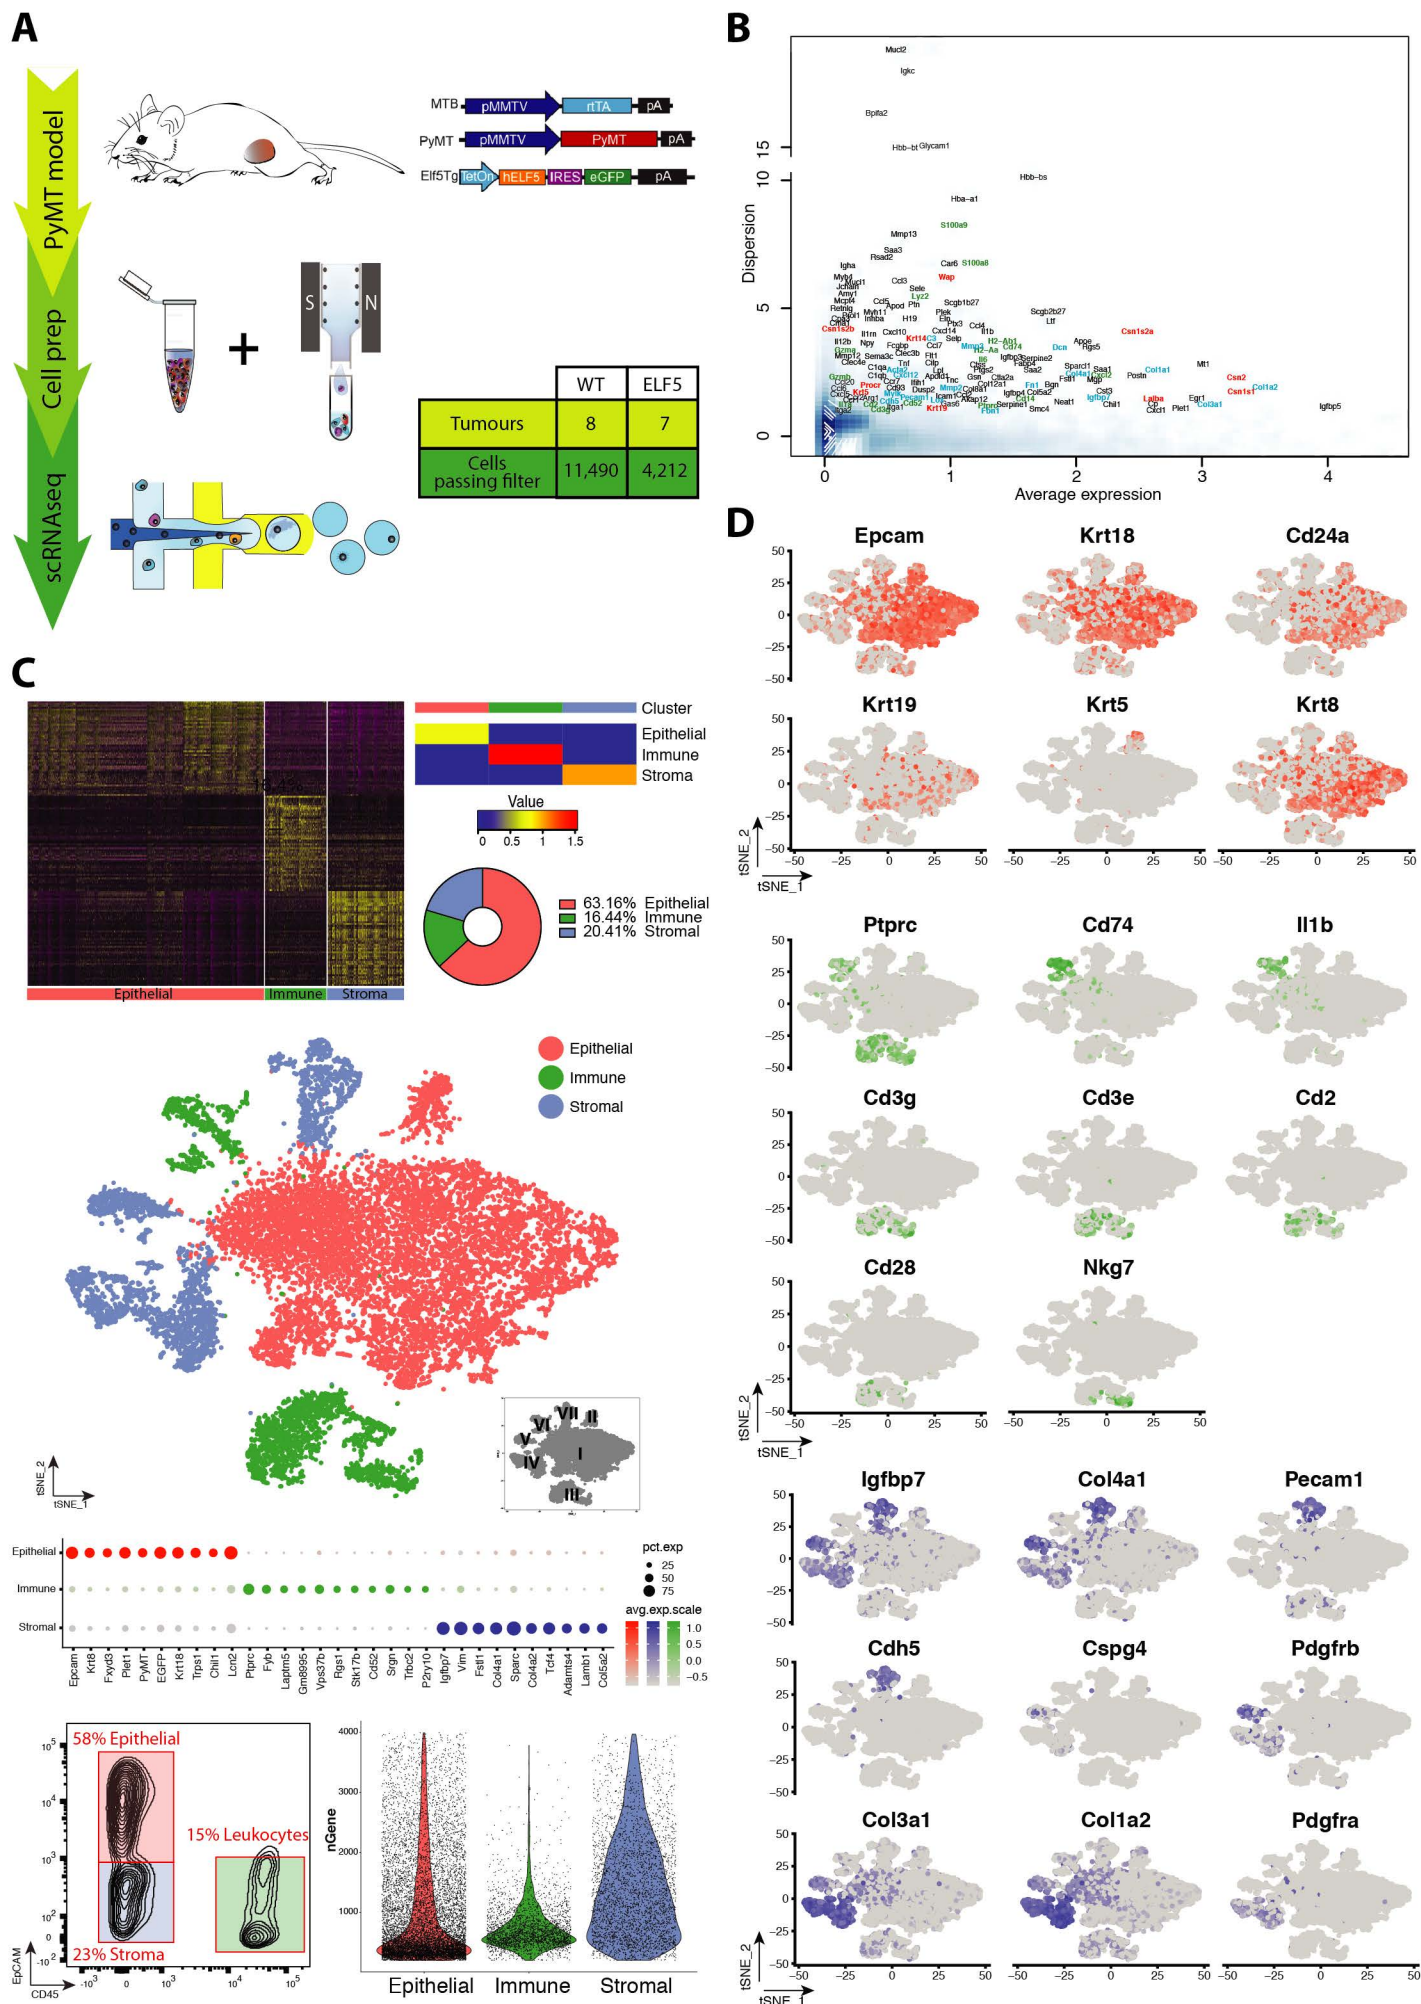

Figure 1 Valdes-Mora et al. 2019



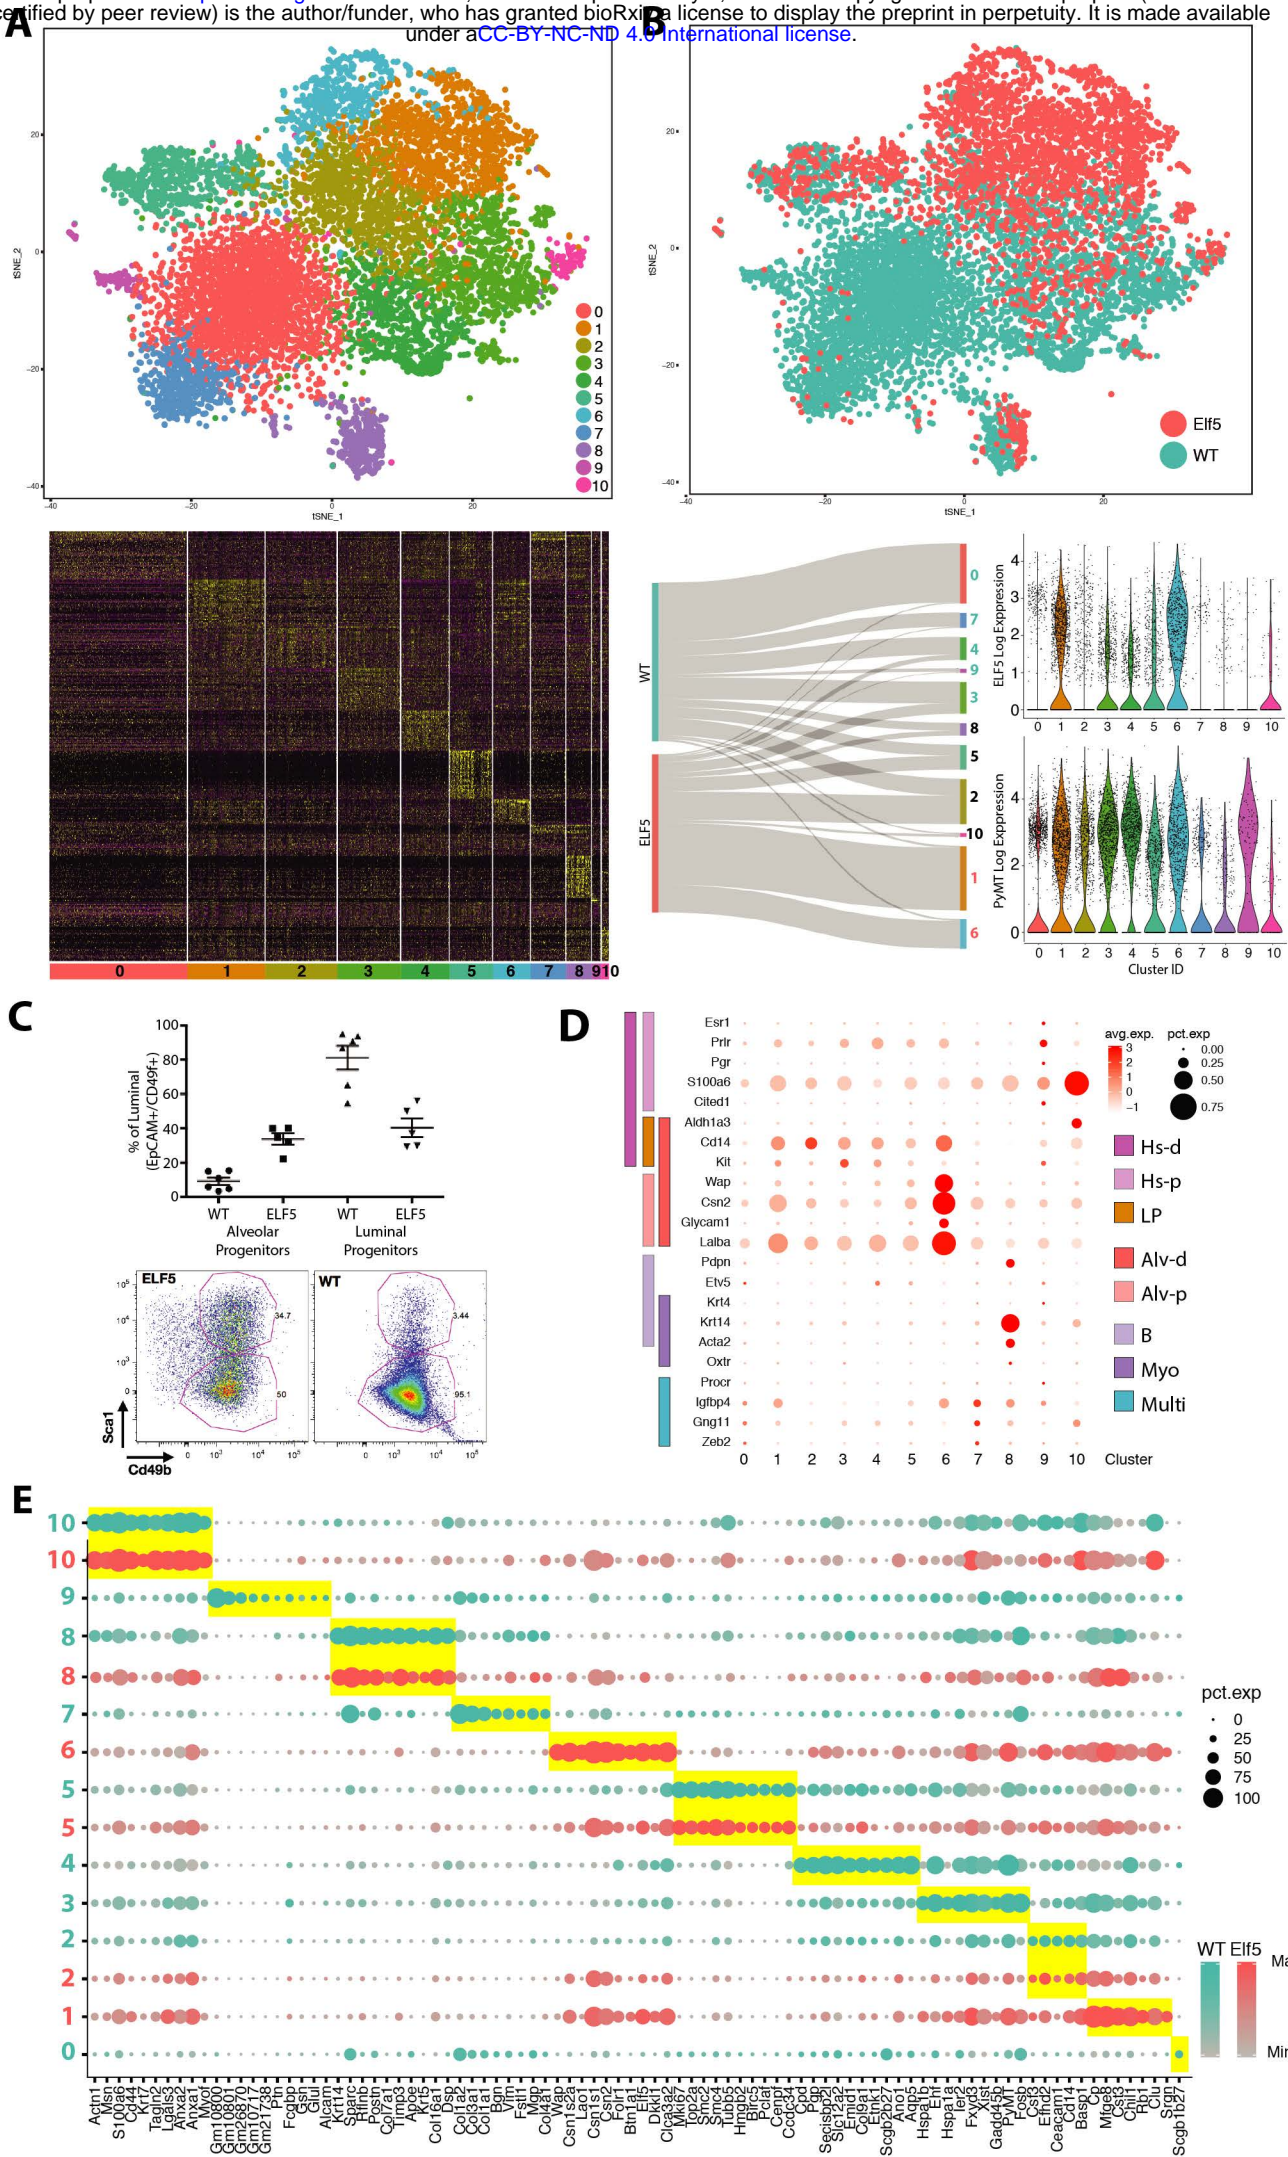

Figure 3 Valdes-Mora et al. 2019

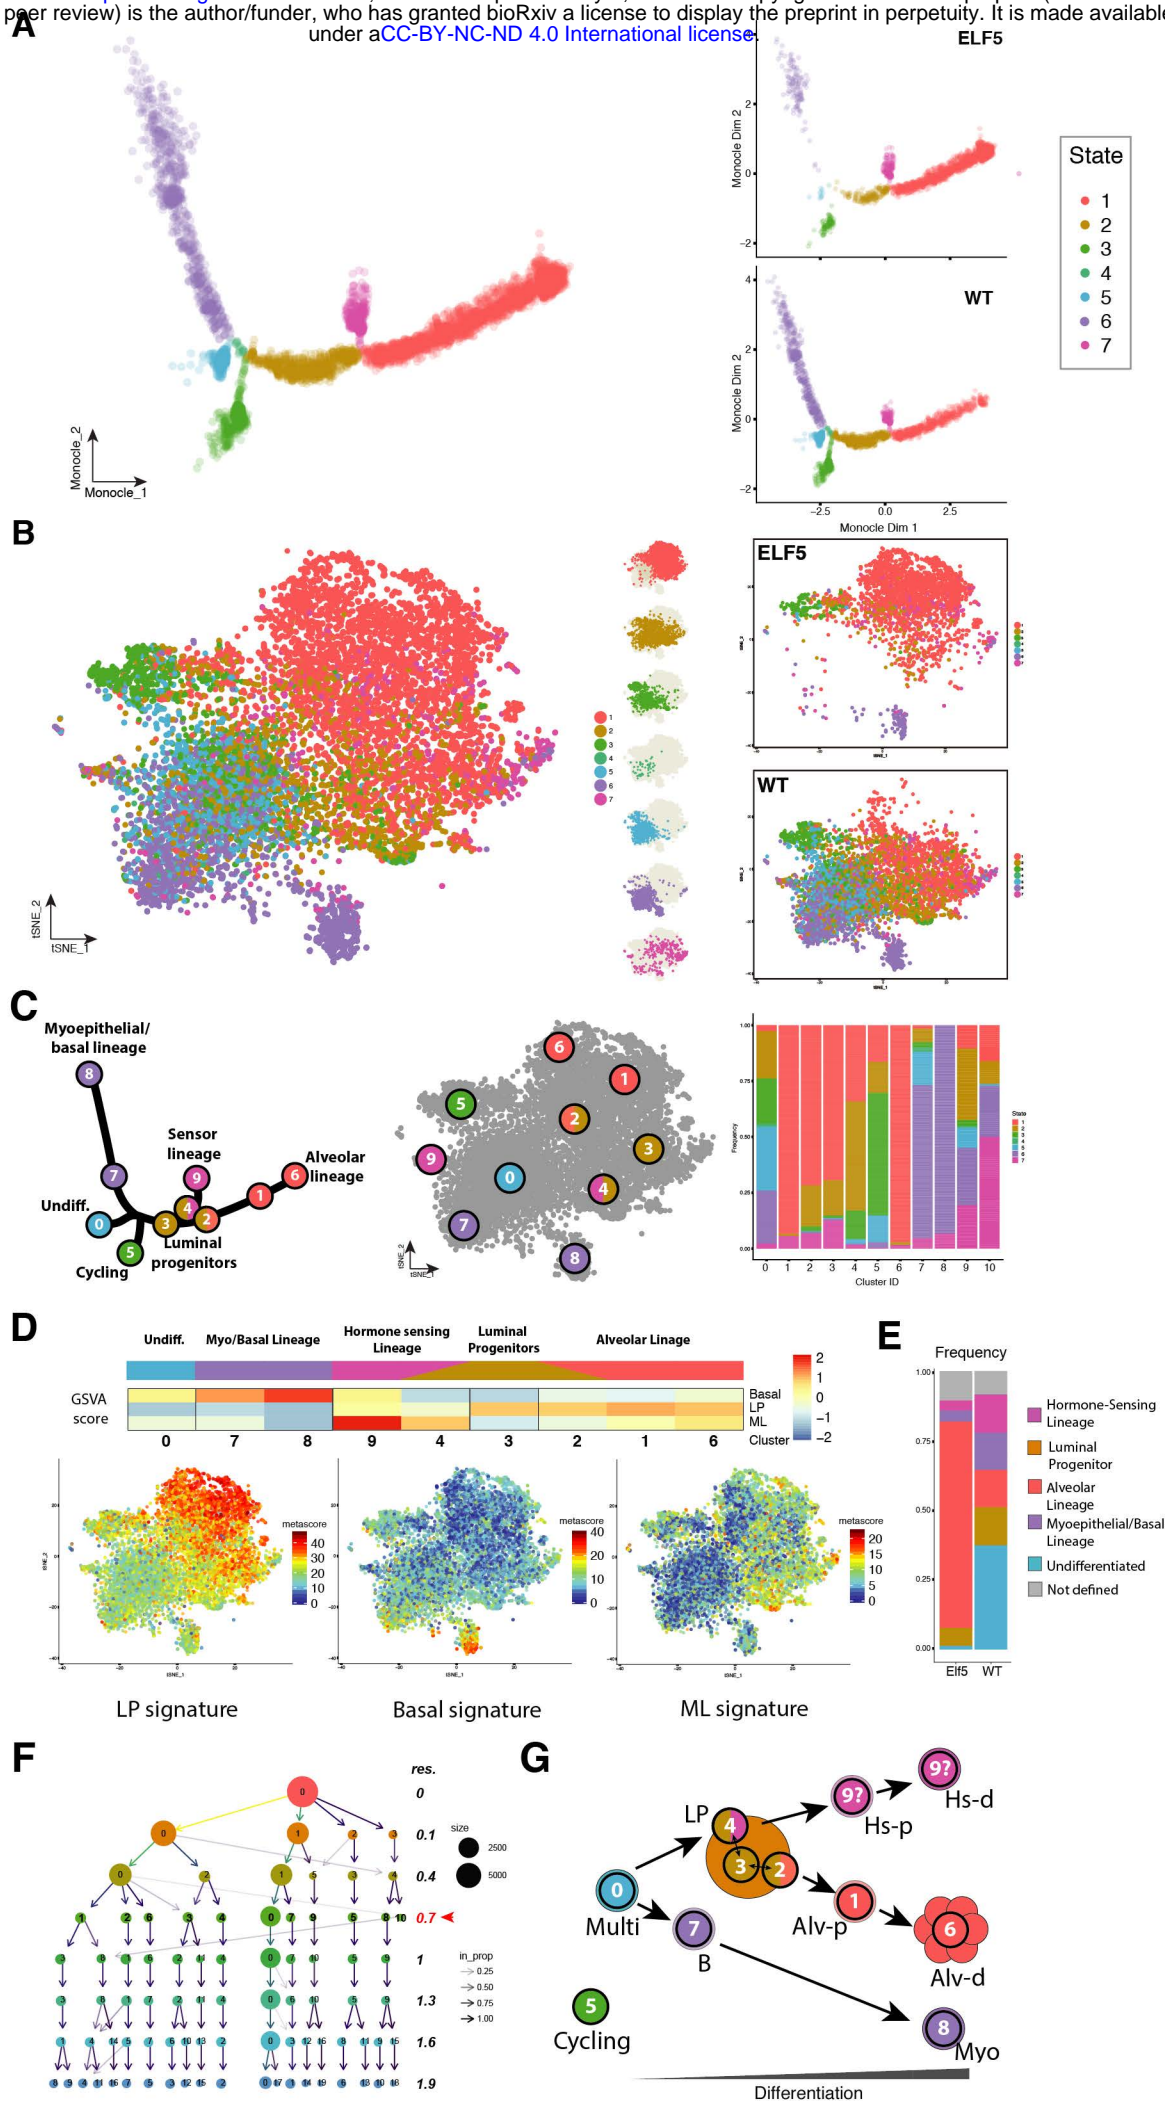

Figure 4 Valdes-Mora et al. 2019

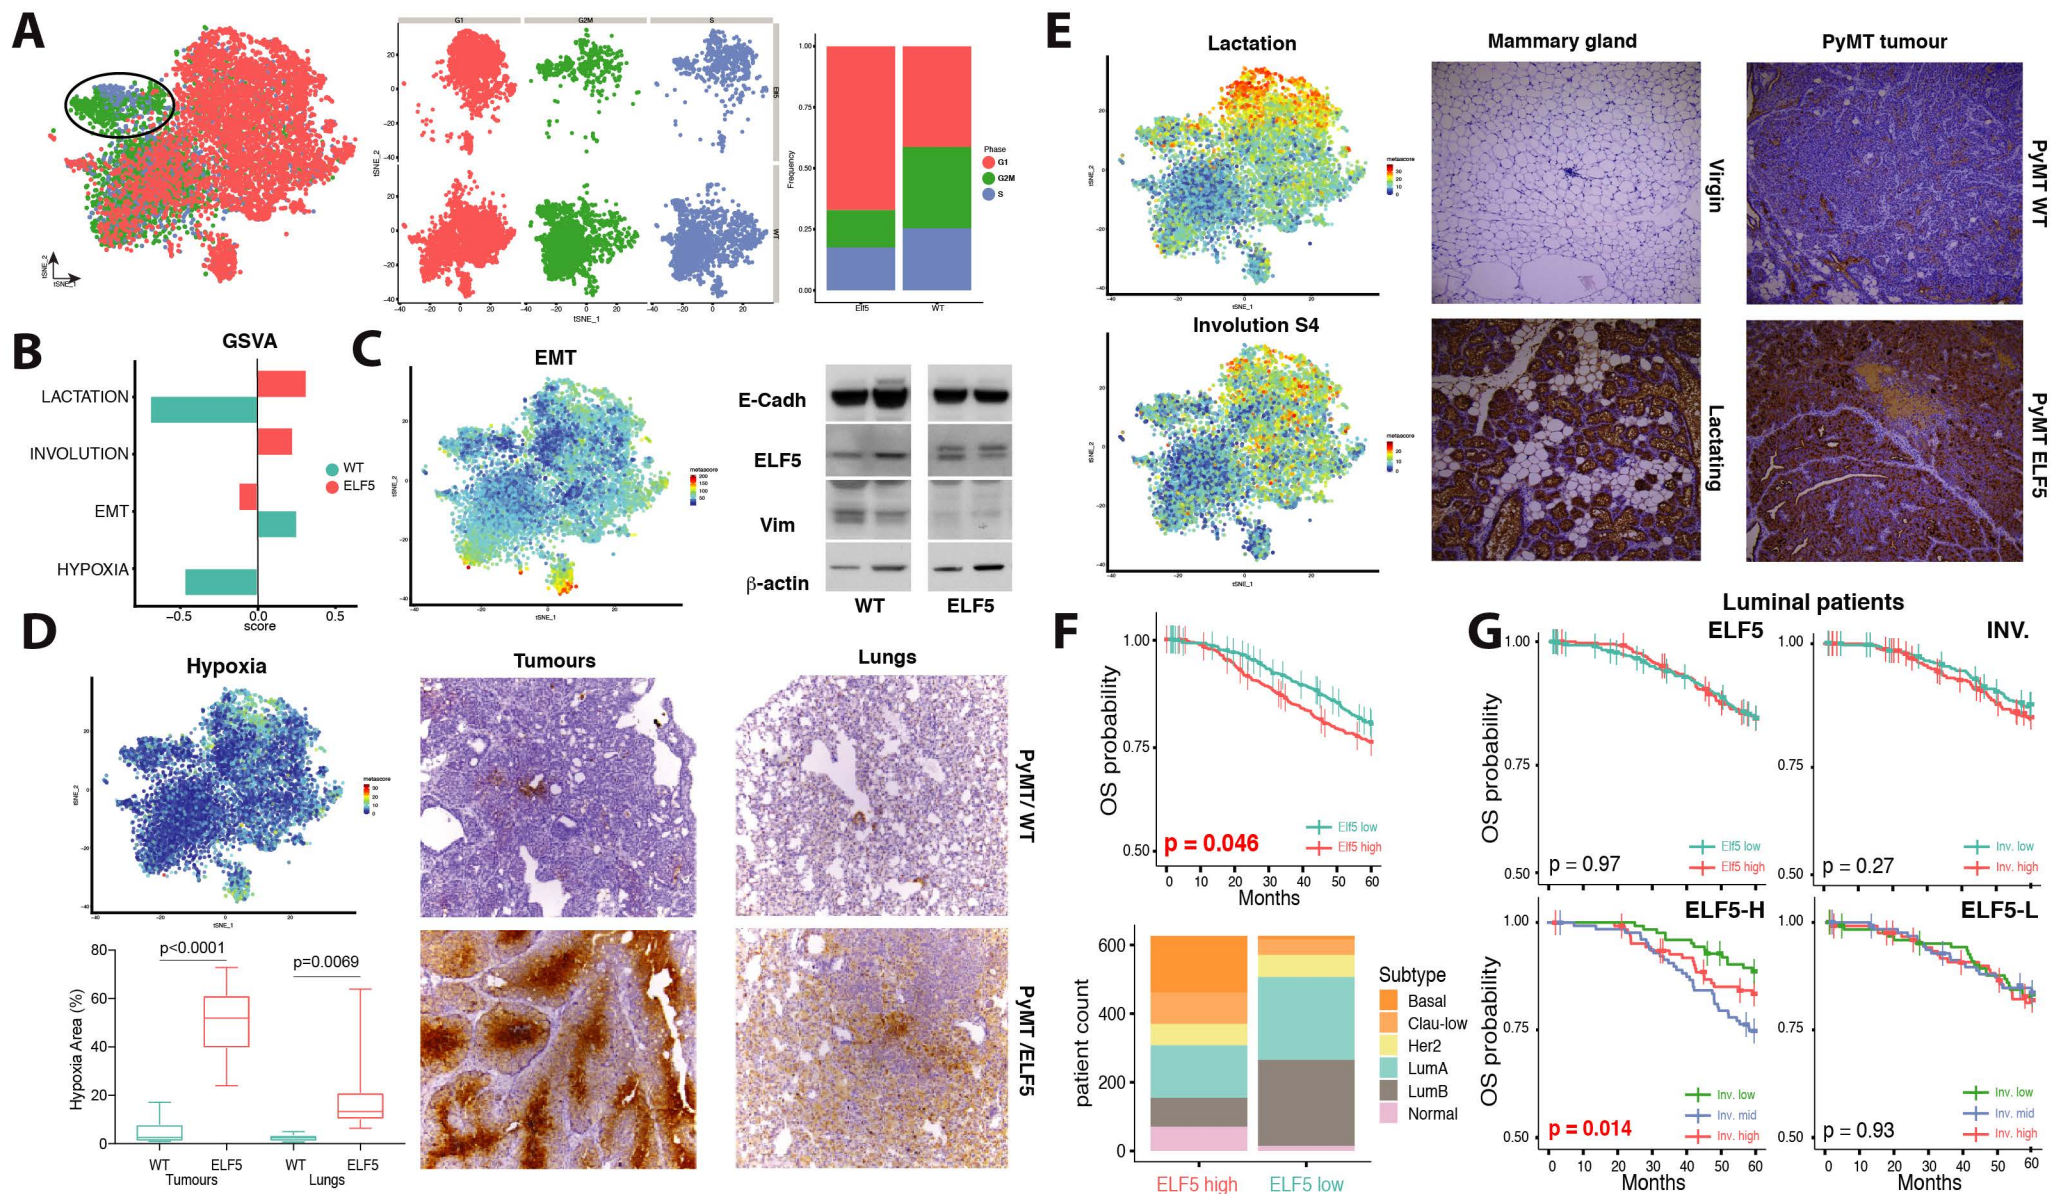

Figure 5 Valdes-Mora et al. 2019

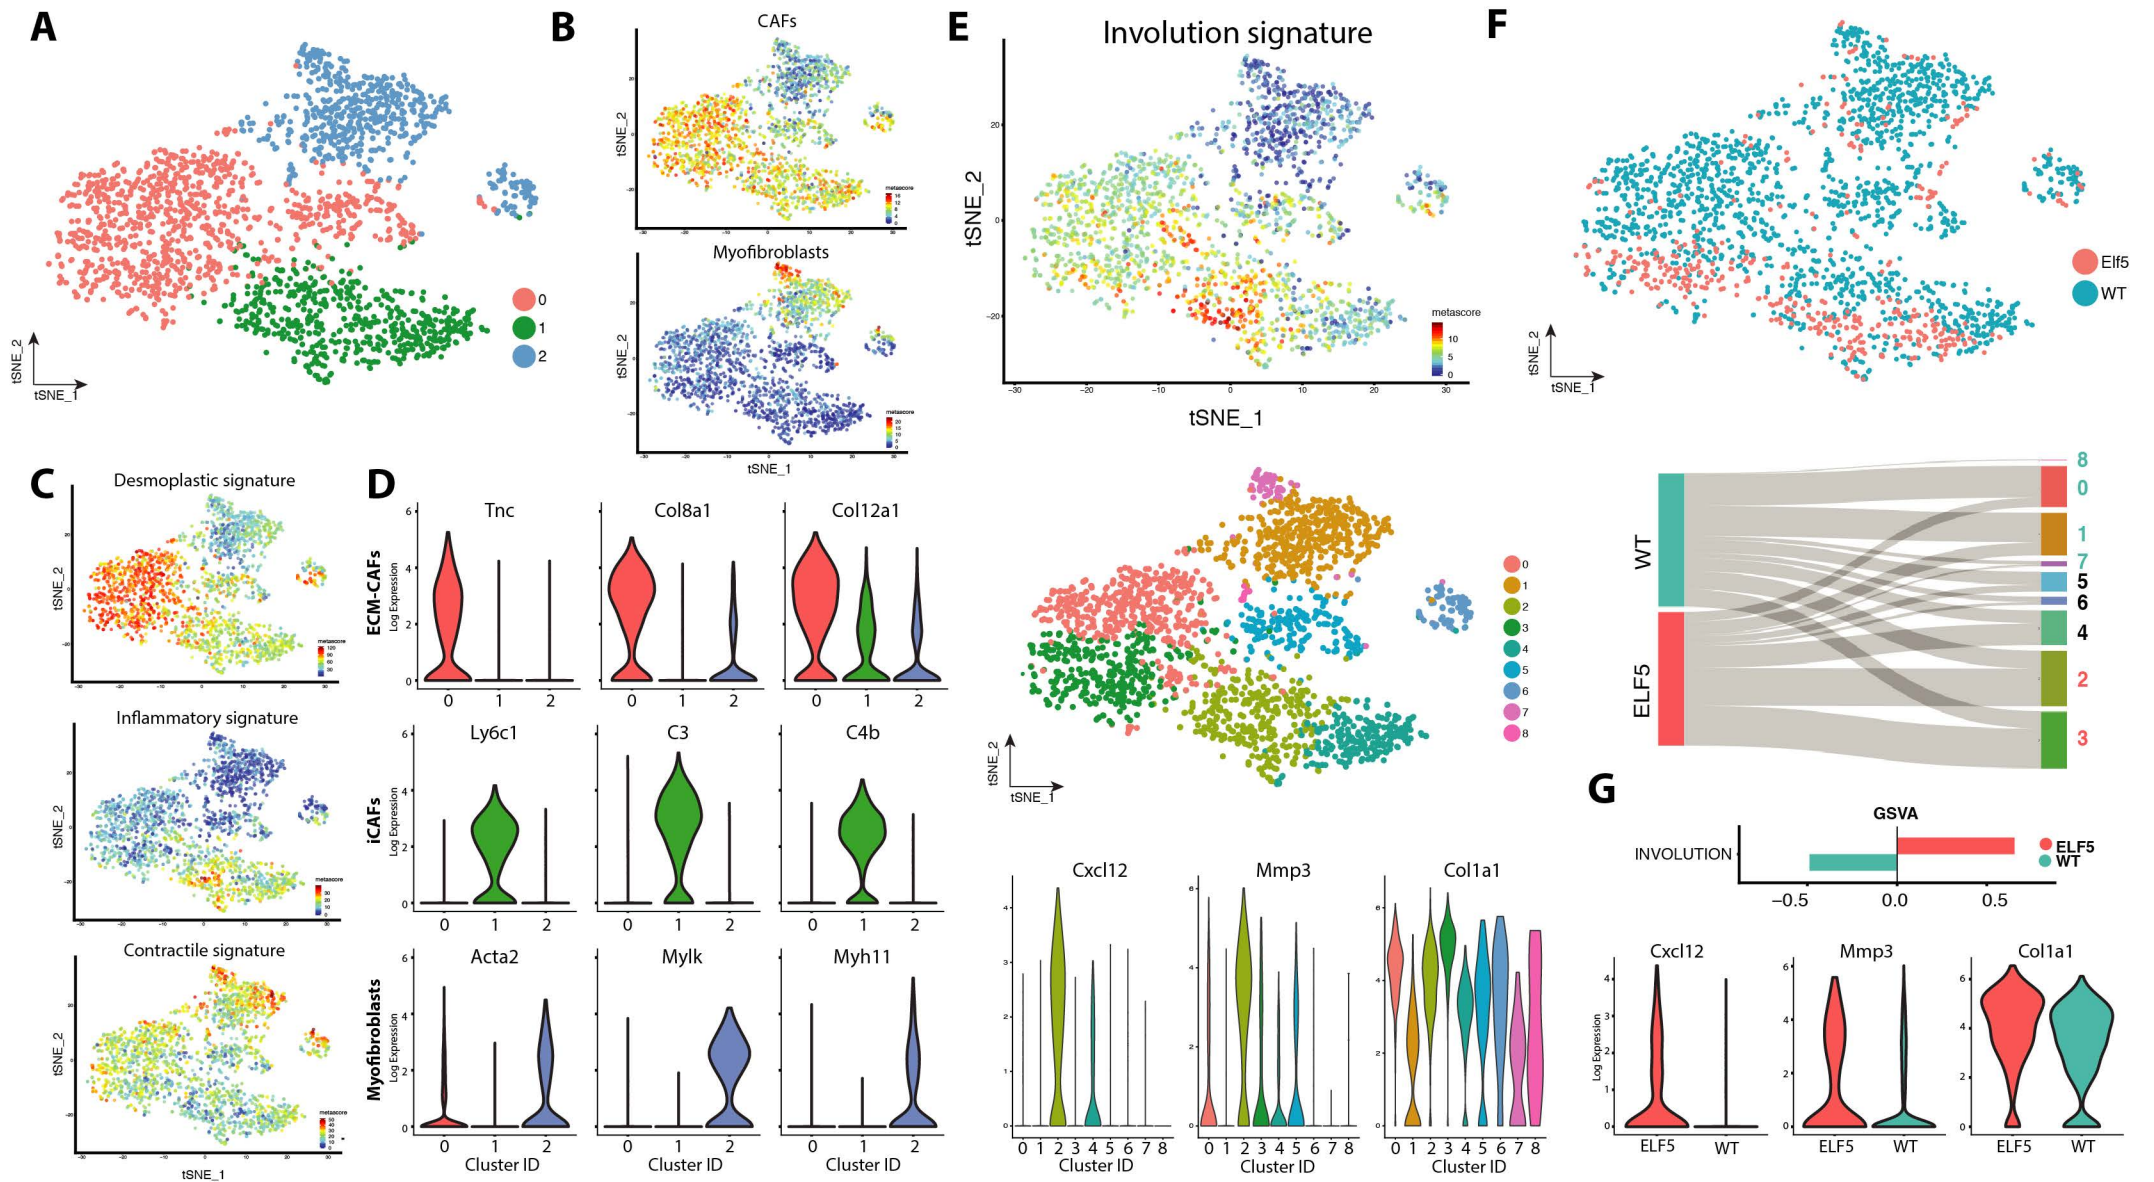

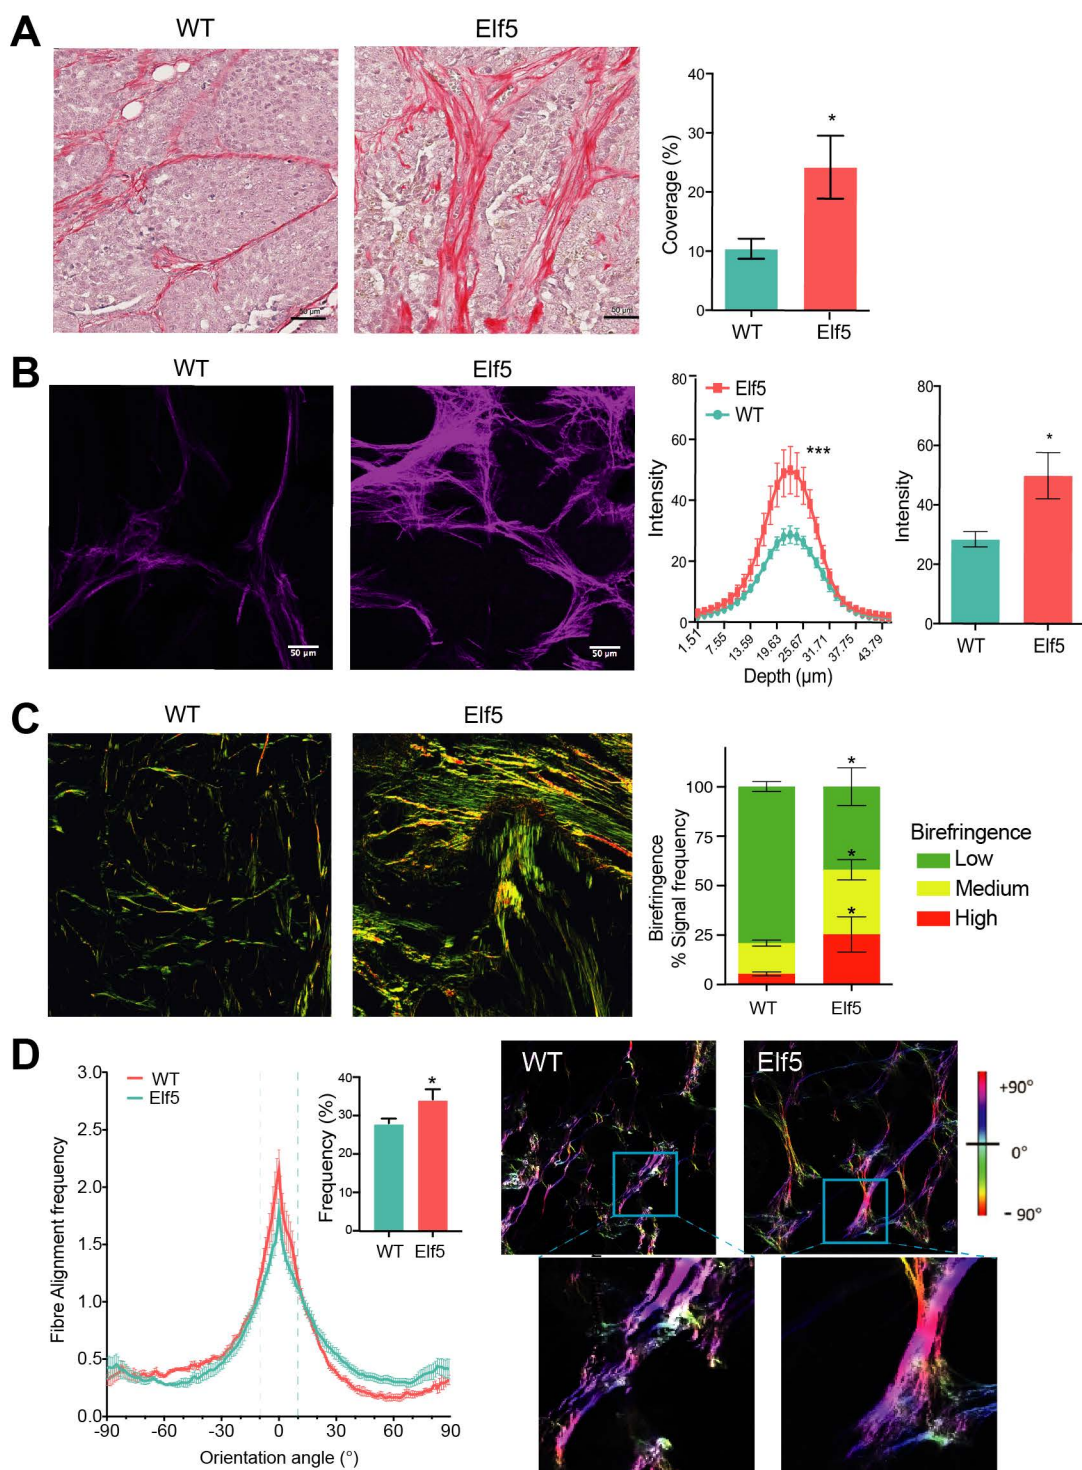

Figure 7. Valdes Mora et al

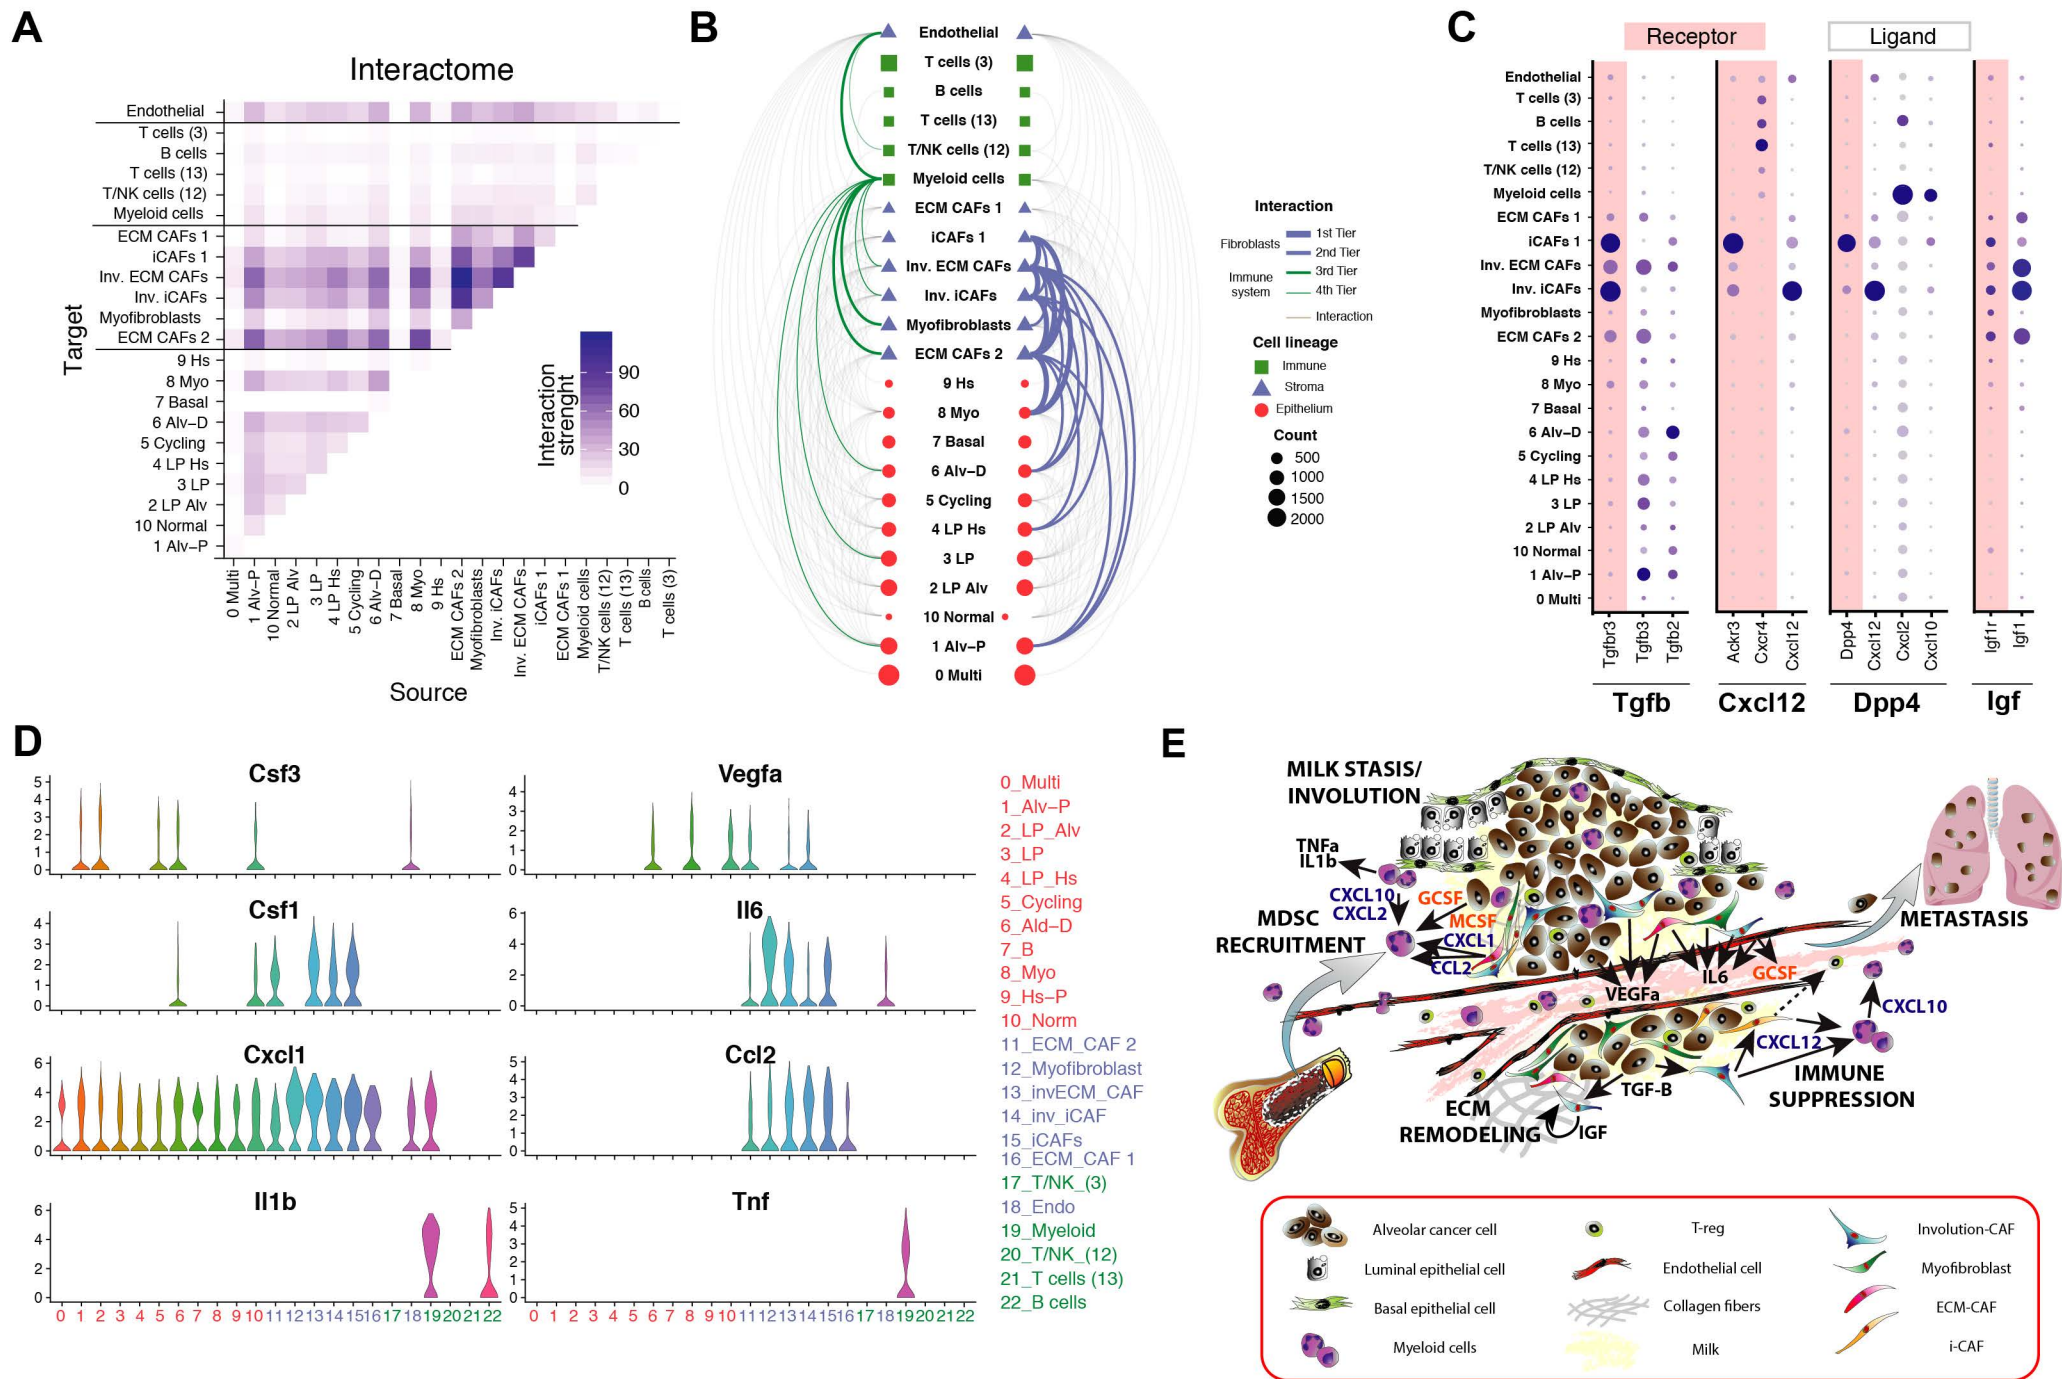

Figure 8. Valdes Mora et al. 2019
